# Supplementary material for: Cost-effective adaptation strategies to rising river flood risk in Europe
Source: Springer Nature journal article supplement (doi:10.1038/s41558-022-01540-0), 2023-02-01
Supplement: MOESM1 [file 41558_2022_1540_MOESM1_ESM.pdf]

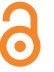

---

# Cost-effective adaptation strategies to rising river flood risk in Europe

---

In the format provided by the authors and unedited

# **Cost-effective adaptation strategies to rising river flood risk in Europe**

## **Supplementary Information**

### **Summary**

*S1. Additional details on Methods*

*S1.1 Climate projections*

*S1.2 Data collection for adaptation modelling*

*S1.3 Modelling of the adaptation measures*

*S1.4 Sensitivity analysis*

*S2. Supplementary results*

*S3. Database of flood protection levels*

*S4. Reliability and uncertainty of the modelling components*

*S5. SI References*

## S1. Additional details on Methods

### S1.1 Climate projections

Table S1. Regional climate projections used in river flood impact analysis and corresponding year of exceeding 1.5, 2 and 3°C warming. Years are calculated using a 30-year moving average of surface air temperature. For the description of the climate models see [1].

| RCM (R)    | Driving GCM (G)       | RCP4.5 | RCP8.5 | RCP4.5 | RCP8.5 | RCP4.5 | RCP8.5 |
|------------|-----------------------|--------|--------|--------|--------|--------|--------|
|            |                       | 1.5 °C |        | 2 °C   |        | 3 °C   |        |
| CCLM4.8-17 | CNRM-CERFACS-CNRM-CM5 | 2035   | 2029   | 2057   | 2044   |        | 2067   |
|            | ICHEC-EC-EARTH        | 2033   | 2026   | 2056   | 2041   |        | 2066   |
|            | MPI-M-MPI-ESM-LR      | 2034   | 2028   | 2064   | 2044   |        | 2067   |
| HIRHAM5    | ICHEC-EC-EARTH        | 2032   | 2028   | 2054   | 2043   |        | 2065   |
| WRF331F    | IPSL-IPSL-CM5A-MR     | 2023   | 2021   | 2042   | 2035   |        | 2054   |
| RACMO22E   | ICHEC-EC-EARTH        | 2032   | 2026   | 2056   | 2042   |        | 2065   |
| RCA4       | CNRM-CERFACS-CNRM-CM5 | 2035   | 2029   | 2057   | 2044   |        | 2067   |
|            | ICHEC-EC-EARTH        | 2033   | 2026   | 2056   | 2041   |        | 2066   |
|            | IPSL-IPSL-CM5A-MR     | 2023   | 2021   | 2042   | 2035   |        | 2054   |
|            | MOHC-HadGEM2-ES       | 2021   | 2018   | 2037   | 2030   | 2069   | 2051   |
|            | MPI-M-MPI-ESM-LR      | 2034   | 2028   | 2064   | 2044   |        | 2067   |

### S1.2 Data collection for adaptation modelling

For the adaptation analysis, we constructed a database of flood risk reduction investments based on a review of scientific, grey and technical literature. The database provides an overview of the main types of investments applied in case studies, mainly in Europe [2,3,4,5]. We used information on size and cost of past applications in literature to derive unit costs of adaptation measures suitable for application within a pan-European framework (e.g. the cost to increase the height of one linear kilometre of dyke by one meter). We also compiled information to clarify the link between implementation costs and impact reduction (e.g. damage reduction factors reported for specific flood-proofing measures). Table S2 summarizes the unit costs derived from the database of adaptation measures.

We include in the adaptation analysis only measures for which we found sufficient and robust information on quantitative costs (especially unit costs) and performance estimates. Other risk reduction measures are not considered because information was insufficient, or because they were deemed not suitable for the scope of the study. For instance, flood early warning systems (EWSs)

are used in several countries and river basins in Europe, but the studies evaluating their cost effectiveness are limited and with contrasting findings. Pappenberger et al. [6] estimated a monetary benefit of the order of 400€ for every 1€ invested in continental-scale flood early warning systems (EWSs). However, other studies [7] calculated much lower cost-to-benefit ratios for a local-scale EWS. Furthermore, we could not find studies providing unit costs (e.g. based on the extension of the river network to be monitored) for setting up or improving existing EWSs.

*Table S2. Summary of unit costs derived from the database of adaptation measures. The table reports also the damage reduction ratios for flood-proofing measures for buildings. For the details on how to access the complete database see the Data Availability section.*

| Normalized unit cost (2015)      |       |         |                |        |                |
|----------------------------------|-------|---------|----------------|--------|----------------|
|                                  |       | Average | 25% percentile | median | 75% percentile |
| Dike systems reinforcement       | €/m/m | 6405    | 1829           | 3941   | 9514           |
| Detention areas                  | €/m3  | 3.73    | 1.05           | 3.59   | 5.00           |
| Flood-proofing measures          | €/m2  | 376     | 156            | 270    | 493            |
| Relocation                       | €/m2  | 1373    | 906            | 1252   | 1826           |
| Damage reduction ratio (average) |       |         |                |        |                |
|                                  |       | Average | 25% percentile | median | 75% percentile |
| Flood-proofing measures          | (-)   | 41%     | 10%            | 37%    | 80%            |

Dams and reservoirs are traditional flood control measures and are widely used in Europe [8]. The current LISFLOOD hydrological setup includes more than 1400 reservoirs and 200 lakes across Europe, which are modelled using a two-parameter approach that regulates outflow considering inflow and stored volume (<https://ec-jrc.github.io/lisflood-model/>, last access on 12 July 2022). While the effect of existing structures is considered in the hydrological model, we do not consider the building of new structures as a possible adaptation measure and focus only on exploiting natural retention and detention in floodplains. This is done for a number of reasons:

- Flood control dams and reservoirs are site-dependent and highly engineered structures, meaning that simulating their design (e.g. dimensioning, estimation of costs, design of operating rules) is not suitable for a continental-scale study.
- Flood control dams and reservoirs are typically in-line structures that modify the flow regime in all conditions, but the operating rules of existing structures are generally not known. Simulating new dams would require reproducing the combined effects of existing and new protection structures, adding further large uncertainty to the modelling framework (see Section S4 for a more detailed discussion).
- Traditional flood control reservoirs have high costs, negatively impact ecosystems and may create societal stresses [8,9]. Conversely, here we are interested in disentangling how using the storage potential of floodplains can reduce flood risk through a more spatially-distributed approach, while minimizing local negative impacts.

### *S1.3 Modelling of the adaptation measures*

#### *Detention areas*

River detention areas (or basins) are areas located along river channels designed to temporarily retain floodwater volumes, thus reducing and delaying peak flows during extreme events [4]. Detention areas are generally surrounded by a dike and capture floodwater above a pre-defined water level through control devices (a pipe or a spillway), while other outlet structures are used to release water back in the river channel. Areas designed to permanently retain some volume of water at all times are usually called retention basins, even though in scientific literature there is some overlap on the definition of retention and detention. Here we assume that floodwater is stored temporarily, even though permanent storage might be viable in some cases. Detention and retention areas can be considered as nature-based solutions because they leverage the storage potential of natural floodplains [10], complementing it with structures to allow for safe income, storage and outgoing of floodwaters.

#### *Flood proofing measures*

Flood-proofing measures are structural and non-structural modifications of buildings aimed at preventing or minimizing flood damage to structures and/or their contents [11,12]. Dry flood

proofing aims at making a building impermeable to floodwaters up to the expected floodwater height (e.g. waterproof sealing of the cellar). Wet flood proofing measures allow flooding of the structure and reduce damages by means of flood-adapted use and equipment of buildings (e.g. usage of waterproofed building material and movable furniture). Flood proofing measures applicable depend on local flood and exposure characteristics (e.g. expected range of flood water depths, type and structure of the building to be protected). Most research works on these measures provide an overview of costs and benefits for specific case studies [4,12], and few studies report analytical analyses of different measures on real cases [13] or standardized buildings [14].

#### *S1.4 Sensitivity analysis*

The sensitivity analysis of the modelling framework is carried out by performing multiple runs with different combinations of parameter values and modelling assumptions. We take into account the uncertainty in i) climate projections, ii) hydrological-hydraulic modelling, iii) damage calculations and iv) adaptation costs, as outlined in the following subsections.

#### *Climate projections*

Projections of future climate conditions are inherently uncertain, and constitute one of the most considered sources of uncertainty in flood risk modelling studies [15,16]. For climate projections, an ensemble of models is essential, due to the atmosphere being a chaotic system. This allows testing the importance of different model structures and parameterizations, assuming that the ensemble is representative of the domain of possible future conditions. This is taken into account here by using the ensemble of climate projections from EURO-CORDEX [1] listed in Table S1.

#### *Flood hazard modelling*

Hydrological and hydraulic modelling might contribute as much as the climate forcing to the overall uncertainty of river flood risk estimates [16,17]. Contrary to the ensemble approach for climate forcing, high-resolution ensembles of hydrological-hydraulic models forced by EURO-CORDEX are not available for Europe. Therefore, we examined the parameters and modelling assumptions that are more likely to influence the overall uncertainty of the outcomes. Dottori et al. [18] listed several uncertainty sources that might influence the estimation of flood frequency, magnitude and extent (such as extreme value distribution fitting, characterization of input

hydrographs, topographic data, model calibration). The same authors found that flood extent maps have limited sensitivity to the magnitude of peak discharges and to the use of different elevation datasets, due to the simplified representation of river channels and flood defences.

On the other hand, flood protections are crucial in determining overall flood risk in our modelling framework. The cut-off between a flood happening or not is based on comparing frequencies of extreme events with the design standard of flood defences, which are known only in few countries and regions (see Section S3). As such, we opt for including both flood modelling uncertainty and uncertainty in flood protection in a single parameter, which is the estimated level of flood protection. Specifically, we produce alternative maps of protection standards by increasing/reducing by 50% the design return periods for all catchments in Europe, and calculate resulting impacts for each of these protection scenarios. Note that in this way we account for additional uncertainty factors, such as the over-/under-estimation of reported design standards, and the effects of defence failures (not considered in our analysis).

#### *Economic impacts*

Estimates of flood impacts are affected by considerable uncertainty even when using local scale data and detailed loss models, and continental-scale estimations are no exception [19,20]. We explore the sensitivity of flood impacts considering the uncertainty related to flood damage functions. To this end, we calculate economic losses using the 5<sup>th</sup>, 50<sup>th</sup> (median) and 95<sup>th</sup> percentiles of maximum damage values reported by [21]. We therefore assume that the uncertainty on the maximum damage can represent all other uncertainty sources not explicitly represented, such as the shape of normalized curves and the GDP/construction costs linkage [21]. Note that in the analysis we do not consider indirect economic costs associated to business interruptions, emergency measures and others. We also disregard the uncertainty on population and land-use distribution, assuming that they are less relevant than other sources of uncertainty considered.

#### *Adaptation costs*

The analysis of literature shows that implementation costs are largely variable due to several factors (e.g. type of measure adopted, location, effectiveness). To provide a sample of the sensitivity of results to adaptation costs, we consider three scenarios using the 25<sup>th</sup>, 50<sup>th</sup> (median)

and 75<sup>th</sup> percentiles of the empirical distribution derived from the database of adaptation measures (see Section S1.2). Note that we did not use 5<sup>th</sup>/95<sup>th</sup> percentiles to increase the robustness of estimations, because of the limited amount of data entries available for each measure. Also, we do not consider other sources of uncertainty such as the effectiveness of flood-proofing measures in reducing damage (see Section S4 for further discussion).

### *Scenarios considered*

All the scenarios listed in the previous subsections are combined together assuming that the four main sources of uncertainty are independent from each other. Therefore, we consider a total of 1485 simulations, obtained by combining 22 climate forcing scenarios (11 climate models x2 RCP scenarios), 3 warming levels, 3 flood protection scenarios, 3 damage model scenarios and 3 adaptation cost scenarios.

We further assume a complete spatial dependence of the parameter uncertainty over the continent, with the exception of parameters derived from climate models. For instance, the scenarios based on the 95<sup>th</sup> percentile of maximum damage assume that damage is estimated everywhere using the local 95<sup>th</sup> percentile value. We take such assumption because it was not possible to determine the spatial correlation of parameter values, except for the climate model ensemble where spatial correlations directly derive from model results. This is a penalizing assumption for the modelling framework because the resulting uncertainty ranges are broadly similar at local and continental scale. Assuming some degree of spatial independence of parameter values (i.e. the hazard model bias is correlated at local/regional scale but not at broader scale) would likely narrow the uncertainty range at continental scale, while leaving comparable uncertainty ranges at local/regional scale [22]. For this reason, we present model outcomes using the interquartile range rather than the 90% confidence interval.

Note that in our sensitivity analysis we disregard uncertainty due to socio-economic scenarios. This is done because, on the one hand, socio-economic projections for Europe applied here do not include uncertainty estimations [23,24]; on the other hand, global scenarios derived from Shared Socio-economic Pathways (SSPs) have much coarser spatial resolution and therefore are not suitable to estimate uncertainty at European scale. Nevertheless, we believe that the overall number of scenarios included is sufficient to show the robustness of the outcomes of the risk and adaptation analysis.



## S2. Supplementary results

Table S3. Summary of the expected annual damage (EAD) in million € (2015 values) for all the countries of the study area and for the whole study area (EU+UK, in bold), under present conditions (base), and for the year 2100 under future socioeconomic conditions and climate scenarios (1.5°C, 2°C, 3°C warming). For each climate scenario the table provides the ensemble median (med) and the first/third quartile (Q1-Q3).

| Country           | baseline    |                   | 1.5°C        |                    | 2°C          |                    | 3°C          |                    |
|-------------------|-------------|-------------------|--------------|--------------------|--------------|--------------------|--------------|--------------------|
|                   | med         | Q1-Q3             | med          | Q1-Q3              | med          | Q1-Q3              | med          | Q1-Q3              |
| Austria           | 274         | 175-427           | 737          | 487-1094           | 755          | 471-1274           | 1019         | 668-1774           |
| Belgium           | 219         | 139-338           | 711          | 431-1063           | 972          | 615-1472           | 1466         | 830-2316           |
| Bulgaria          | 87          | 58-129            | 187          | 122-279            | 220          | 130-360            | 295          | 165-500            |
| Croatia           | 181         | 123-273           | 543          | 364-768            | 724          | 471-1088           | 927          | 627-1375           |
| Cyprus            | 4           | 3-7               | 8            | 5-11               | 7            | 4-11               | 5            | 3-8                |
| Czechia           | 418         | 277-668           | 1045         | 699-1635           | 1324         | 843-2043           | 1883         | 1002-3197          |
| Denmark           | 14          | 9-23              | 39           | 26-58              | 51           | 34-79              | 76           | 49-127             |
| Estonia           | 56          | 37-87             | 111          | 67-165             | 123          | 62-230             | 151          | 78-283             |
| Finland           | 227         | 151-392           | 528          | 340-836            | 758          | 399-1266           | 901          | 463-1716           |
| France            | 1291        | 816-2104          | 4420         | 2837-6962          | 6471         | 4148-10018         | 8007         | 5121-11490         |
| Germany           | 930         | 569-1500          | 2812         | 1841-4189          | 3671         | 2408-5993          | 5330         | 3238-8302          |
| Greece            | 76          | 50-122            | 109          | 74-163             | 124          | 76-209             | 156          | 83-312             |
| Hungary           | 265         | 169-413           | 807          | 530-1210           | 1129         | 640-1786           | 1803         | 991-3142           |
| Ireland           | 62          | 38-103            | 199          | 130-292            | 248          | 162-370            | 482          | 304-748            |
| Italy             | 876         | 610-1314          | 2503         | 1626-3564          | 2806         | 1833-4359          | 4335         | 2759-6718          |
| Latvia            | 220         | 133-338           | 452          | 296-673            | 506          | 304-860            | 626          | 360-1223           |
| Lithuania         | 111         | 70-176            | 223          | 149-330            | 254          | 142-437            | 294          | 160-581            |
| Luxembourg        | 18          | 10-31             | 57           | 36-90              | 79           | 47-138             | 99           | 57-155             |
| Netherlands       | 74          | 49-117            | 252          | 150-449            | 415          | 216-809            | 530          | 279-1235           |
| Poland            | 590         | 382-898           | 1394         | 933-2004           | 1698         | 1089-2609          | 2317         | 1508-3746          |
| Portugal          | 53          | 33-86             | 85           | 52-126             | 85           | 56-129             | 82           | 45-127             |
| Romania           | 334         | 205-547           | 840          | 564-1243           | 1091         | 662-1729           | 1637         | 846-2572           |
| Slovakia          | 148         | 97-224            | 420          | 279-608            | 499          | 310-745            | 685          | 407-1113           |
| Slovenia          | 61          | 41-90             | 149          | 101-225            | 205          | 130-311            | 282          | 179-447            |
| Spain             | 479         | 322-710           | 957          | 636-1426           | 977          | 629-1500           | 1055         | 676-1563           |
| Sweden            | 231         | 141-369           | 771          | 502-1204           | 1337         | 759-2303           | 2281         | 1180-4686          |
| UK                | 687         | 467-1011          | 2155         | 1401-3038          | 2668         | 1786-4133          | 4621         | 3066-6856          |
| <b>EU-27 + UK</b> | <b>7645</b> | <b>5672-11205</b> | <b>23005</b> | <b>15371-33232</b> | <b>30999</b> | <b>21620-44902</b> | <b>43609</b> | <b>30431-61422</b> |

*Table S4. Summary of the expected annual population exposed (EAPE) in thousand people for all the countries of the study area and for the whole study area (EU+UK, in bold), under present conditions (base), and for the year 2100 under future socioeconomic conditions and climate scenarios (1.5°C, 2°C, 3°C warming). For each climate scenario the table provides the ensemble median (med) and the first/third quartile (Q1-Q3).*

| Country           | baseline     |                    | 1.5°C        |                    | 2°C          |                  | 3°C          |                    |
|-------------------|--------------|--------------------|--------------|--------------------|--------------|------------------|--------------|--------------------|
|                   | med          | Q1-Q3              | med          | Q1-Q3              | med          | Q1-Q3            | med          | Q1-Q3              |
| Austria           | 4.1          | 2.7-6.2            | 6.0          | 4.3-9.6            | 6.7          | 4.1-10           | 8.4          | 5.9-12.4           |
| Belgium           | 3.9          | 2.6-6.3            | 8.8          | 6.6-14.4           | 12.4         | 8.4-19.3         | 19.5         | 13.1-31.9          |
| Bulgaria          | 2.9          | 2-4.3              | 1.9          | 1.4-3.1            | 2.5          | 1.4-4            | 2.9          | 2.1-5.8            |
| Croatia           | 4.6          | 3.3-7.2            | 7.1          | 5.6-11.4           | 10.4         | 7.6-15.4         | 14.3         | 11.4-22.9          |
| Cyprus            | 0.0          | 0-0                | 0.0          | 0-0                | 0.0          | 0-0              | 0.0          | 0-0                |
| Czechia           | 6.9          | 4.8-10.4           | 9.8          | 7.6-17.6           | 12.4         | 9.1-18.7         | 18.6         | 11.8-29.1          |
| Denmark           | 0.1          | 0.1-0.2            | 0.2          | 0.2-0.3            | 0.3          | 0.2-0.4          | 0.5          | 0.3-0.6            |
| Estonia           | 0.8          | 0.5-1.2            | 0.9          | 0.6-1.4            | 1.0          | 0.5-1.8          | 1.3          | 0.6-2.1            |
| Finland           | 3.2          | 1.9-5.4            | 4.0          | 2.5-5.2            | 5.0          | 3.1-8.4          | 5.5          | 3.4-12.7           |
| France            | 21.9         | 14.3-34.1          | 49.8         | 33.9-78.7          | 74.2         | 52.9-117.1       | 88.3         | 64.7-140.8         |
| Germany           | 27.3         | 18.1-46.2          | 45.4         | 31.5-67.2          | 61.9         | 40.5-84.2        | 86.7         | 54.1-132.6         |
| Greece            | 1.8          | 1.2-2.6            | 1.8          | 1.3-2.7            | 2.2          | 1.3-3.3          | 2.4          | 1.3-4.4            |
| Hungary           | 6.4          | 4.5-10.7           | 10.3         | 7.1-14.7           | 13.6         | 7.7-21.6         | 21.6         | 14-36.7            |
| Ireland           | 0.9          | 0.5-1.4            | 1.6          | 1.3-2.7            | 2.0          | 1.5-3.3          | 4.5          | 2.4-5.9            |
| Italy             | 19.0         | 14-28.3            | 31.4         | 24.4-51.1          | 40.1         | 24.5-53.2        | 60.0         | 37.8-82.7          |
| Latvia            | 4.2          | 2.7-6.3            | 2.6          | 1.9-4.6            | 3.0          | 2-5.5            | 3.9          | 2.5-7.4            |
| Lithuania         | 1.4          | 0.9-1.9            | 1.0          | 0.7-1.6            | 1.1          | 0.7-1.9          | 1.4          | 0.8-2.6            |
| Luxembourg        | 0.1          | 0.1-0.2            | 0.4          | 0.2-0.6            | 0.5          | 0.3-0.9          | 0.7          | 0.3-1              |
| Netherlands       | 1.6          | 1.1-2.3            | 2.6          | 1.7-5.1            | 4.4          | 2.5-8.7          | 5.5          | 3.2-13.9           |
| Poland            | 18.6         | 13.1-30.3          | 20.7         | 15.1-33            | 26.6         | 17.5-39.5        | 35.7         | 23.9-54            |
| Portugal          | 0.8          | 0.5-1.3            | 1.1          | 0.8-1.9            | 1.2          | 0.8-1.7          | 1.2          | 0.7-1.9            |
| Romania           | 12.8         | 8.5-18.4           | 12.5         | 9.3-20.1           | 15.8         | 11.2-24          | 22.2         | 12.8-33.7          |
| Slovakia          | 3.3          | 2.2-4.9            | 3.8          | 2.8-6.1            | 4.8          | 3.5-7            | 6.9          | 3.8-9.4            |
| Slovenia          | 1.0          | 0.8-1.6            | 1.4          | 1-2.2              | 2.0          | 1.2-3            | 2.5          | 1.9-4.3            |
| Spain             | 11.1         | 7.8-19.4           | 16.7         | 11.9-29.3          | 17.0         | 12-28.7          | 17.4         | 12.8-29.7          |
| Sweden            | 2.1          | 1.3-3.2            | 4.8          | 3-6.9              | 7.4          | 4.6-11.3         | 11.5         | 7.4-23.9           |
| UK                | 8.4          | 6.1-12             | 16.6         | 13-28.8            | 25.6         | 16-36            | 45.3         | 27.9-62.9          |
| <b>EU-27 + UK</b> | <b>166.4</b> | <b>124.3-276.4</b> | <b>257.9</b> | <b>212.5-422.3</b> | <b>364.8</b> | <b>270.3-525</b> | <b>491.1</b> | <b>370.7-735.6</b> |

*Table S5. Changes in flood impacts in 2100 with respect to present considering only climate change (climate only, 3°C), only socio-economic change (economy only), and both drivers together (climate + economy). Impacts are given at country level and for EU27+UK as expected annual damage (EAD) and population exposed (EAPE). All values refer to the ensemble median.*

| Country           | Change in expected annual damage - 3°C WL |              |                   | Change in expected annual population exposed - 3°C WL |              |                   |
|-------------------|-------------------------------------------|--------------|-------------------|-------------------------------------------------------|--------------|-------------------|
|                   | climate only                              | economy only | climate + economy | climate only                                          | society only | climate + society |
| Austria           | 97%                                       | 108%         | 283%              | 84%                                                   | 25%          | 117%              |
| Belgium           | 244%                                      | 119%         | 562%              | 255%                                                  | 80%          | 398%              |
| Bulgaria          | 109%                                      | 73%          | 254%              | 85%                                                   | -38%         | 20%               |
| Croatia           | 209%                                      | 129%         | 431%              | 210%                                                  | 50%          | 255%              |
| Cyprus            | -35%                                      | 56%          | 14%               | -43%                                                  | 219%         | 107%              |
| Czechia           | 165%                                      | 97%          | 345%              | 167%                                                  | 23%          | 164%              |
| Denmark           | 210%                                      | 96%          | 455%              | 255%                                                  | 15%          | 218%              |
| Estonia           | 62%                                       | 86%          | 251%              | 63%                                                   | 7%           | 90%               |
| Finland           | 128%                                      | 65%          | 371%              | 82%                                                   | -8%          | 145%              |
| France            | 249%                                      | 113%         | 465%              | 223%                                                  | 62%          | 300%              |
| Germany           | 280%                                      | 97%          | 491%              | 294%                                                  | 10%          | 238%              |
| Greece            | 67%                                       | 36%          | 164%              | 47%                                                   | 8%           | 85%               |
| Hungary           | 301%                                      | 111%         | 629%              | 303%                                                  | 12%          | 264%              |
| Ireland           | 300%                                      | 112%         | 665%              | 320%                                                  | 43%          | 357%              |
| Italy             | 194%                                      | 109%         | 376%              | 195%                                                  | 36%          | 195%              |
| Latvia            | 67%                                       | 89%          | 227%              | 60%                                                   | -29%         | 14%               |
| Lithuania         | 75%                                       | 75%          | 217%              | 62%                                                   | -28%         | 22%               |
| Luxembourg        | 187%                                      | 123%         | 465%              | 172%                                                  | 205%         | 631%              |
| Netherlands       | 311%                                      | 156%         | 797%              | 252%                                                  | 55%          | 388%              |
| Poland            | 148%                                      | 87%          | 335%              | 137%                                                  | 1%           | 121%              |
| Portugal          | 11%                                       | 32%          | 42%               | 16%                                                   | 29%          | 41%               |
| Romania           | 199%                                      | 97%          | 388%              | 131%                                                  | -12%         | 75%               |
| Slovakia          | 190%                                      | 100%         | 376%              | 195%                                                  | -9%          | 113%              |
| Slovenia          | 191%                                      | 94%          | 384%              | 197%                                                  | 18%          | 182%              |
| Spain             | 28%                                       | 68%          | 100%              | 21%                                                   | 47%          | 59%               |
| Sweden            | 417%                                      | 110%         | 1184%             | 241%                                                  | 69%          | 630%              |
| UK                | 266%                                      | 119%         | 534%              | 314%                                                  | 66%          | 403%              |
| <b>EU-27 + UK</b> | <b>203%</b>                               | <b>102%</b>  | <b>425%</b>       | <b>190%</b>                                           | <b>25%</b>   | <b>200%</b>       |

*Table S6. Overview of key adaptation results based on detention areas at country level for the 1.5°C warming scenario in 2100. The Benefit-Cost Ratio (BCR) is calculated as ratio of discounted benefits and costs over the period 2020-2100. Reduction (in %) in expected annual damage (EAD) and population exposed (EAPE) are calculated as difference in undiscounted damage and population exposed in 2100 with and without adaptation. Cost of implementation (in €million/year) reflect average of undiscounted costs over the period 2020-2100. All variables include the ensemble median (med) and the first/third quartile (Q1-Q3).*

| Country        | Detention areas |                |            |                |            |                |             |                  |
|----------------|-----------------|----------------|------------|----------------|------------|----------------|-------------|------------------|
|                | BCR             |                | EAD red.   |                | EAPE red.  |                | Costs €M/y  |                  |
|                | med             | Q1-Q3          | med        | Q1-Q3          | med        | Q1-Q3          | med         | Q1-Q3            |
| Austria        | 3.0             | 2.1-4.7        | 73%        | 52%-86%        | 80%        | 61%-89%        | 60          | 40-108           |
| Belgium        | 4.2             | 3-6.8          | 78%        | 62%-89%        | 83%        | 70%-91%        | 44          | 29-78            |
| Bulgaria       | 2.7             | 2-3.7          | 70%        | 51%-85%        | 74%        | 57%-88%        | 16          | 10-24            |
| Croatia        | 3.3             | 2.1-6.7        | 89%        | 79%-94%        | 92%        | 84%-96%        | 49          | 21-76            |
| Cyprus         | 0.0             | 0-0            | 0%         | 0%-0%          | 0%         | 0%-0%          | 3           | 1-3              |
| Czechia        | 4.1             | 3.2-5.5        | 81%        | 68%-90%        | 86%        | 76%-92%        | 67          | 48-97            |
| Denmark        | 3.3             | 2.2-5.4        | 85%        | 69%-92%        | 89%        | 78%-94%        | 3           | 2-6              |
| Estonia        | 1.2             | 0-1.9          | 13%        | 0%-61%         | 19%        | 0%-72%         | 2           | 0-14             |
| Finland        | 2.7             | 1.9-3.7        | 53%        | 29%-66%        | 46%        | 30%-61%        | 39          | 19-68            |
| France         | 3.1             | 2.3-4.7        | 74%        | 58%-85%        | 81%        | 69%-90%        | 358         | 257-611          |
| Germany        | 3.5             | 3.1-4.1        | 66%        | 50%-81%        | 68%        | 51%-83%        | 221         | 136-330          |
| Greece         | 2.6             | 1.9-3.6        | 64%        | 43%-78%        | 65%        | 48%-79%        | 10          | 6-15             |
| Hungary        | 2.7             | 2-4.4          | 78%        | 58%-88%        | 82%        | 64%-90%        | 58          | 41-100           |
| Ireland        | 2.4             | 1.9-3.5        | 69%        | 40%-85%        | 77%        | 45%-89%        | 18          | 10-28            |
| Italy          | 4.8             | 3.6-7.6        | 81%        | 71%-88%        | 86%        | 79%-92%        | 157         | 110-252          |
| Latvia         | 2.9             | 1.9-4.5        | 39%        | 21%-62%        | 48%        | 29%-74%        | 22          | 5-45             |
| Lithuania      | 1.7             | 1.1-2.7        | 18%        | 0%-55%         | 29%        | 1%-64%         | 6           | 0-23             |
| Luxembourg     | 3.6             | 2.2-6.4        | 77%        | 57%-90%        | 85%        | 71%-94%        | 5           | 2-8              |
| Netherlands    | 4.0             | 2.5-6.2        | 23%        | 6%-43%         | 26%        | 8%-45%         | 5           | 2-12             |
| Poland         | 2.2             | 1.9-2.9        | 57%        | 33%-75%        | 60%        | 36%-79%        | 122         | 67-192           |
| Portugal       | 2.0             | 1.5-2.5        | 9%         | 3%-20%         | 10%        | 4%-16%         | 1           | 0-4              |
| Romania        | 2.4             | 1.9-2.9        | 43%        | 27%-65%        | 51%        | 34%-67%        | 51          | 27-90            |
| Slovakia       | 3.4             | 2.5-5.3        | 78%        | 58%-88%        | 83%        | 63%-91%        | 28          | 19-50            |
| Slovenia       | 2.3             | 1.7-3.5        | 74%        | 50%-87%        | 78%        | 54%-90%        | 12          | 8-22             |
| Spain          | 2.1             | 1.8-2.5        | 25%        | 13%-49%        | 31%        | 10%-53%        | 54          | 20-122           |
| Sweden         | 2.6             | 1.9-3.9        | 52%        | 30%-68%        | 55%        | 38%-70%        | 55          | 29-89            |
| United Kingdom | 6.5             | 4.6-11.7       | 84%        | 76%-90%        | 86%        | 78%-91%        | 109         | 62-161           |
| <b>EU+UK</b>   | <b>3.5</b>      | <b>2.8-4.8</b> | <b>68%</b> | <b>56%-78%</b> | <b>72%</b> | <b>60%-82%</b> | <b>1641</b> | <b>1135-2394</b> |

*Table S7. Overview of key adaptation results based on dikes strengthening at country level for the 1.5°C warming scenario in 2100. The Benefit-Cost Ratio (BCR) is calculated as ratio of discounted benefits and costs over the period 2020-2100. Reduction (in %) in expected annual damage (EAD) and population exposed (EAPE) are calculated as difference in undiscounted damage and population exposed in 2100 with and without adaptation. Cost of implementation (in €million/year) reflect average of undiscounted costs over the period 2020-2100. All variables include the ensemble median and the first/third quartile (Q1-Q3).*

| Country        | Dikes strengthening |              |            |                |            |                |             |                  |
|----------------|---------------------|--------------|------------|----------------|------------|----------------|-------------|------------------|
|                | BCR                 |              | EAD red.   |                | EAPE red.  |                | Costs €M/y  |                  |
|                | med                 | Q1-Q3        | med        | Q1-Q3          | med        | Q1-Q3          | med         | Q1-Q3            |
| Austria        | 2.1                 | 1.6-3.2      | 55%        | 27%-76%        | 59%        | 28%-79%        | 72          | 34-114           |
| Belgium        | 2.9                 | 2.1-4.8      | 73%        | 53%-87%        | 80%        | 62%-90%        | 56          | 37-102           |
| Bulgaria       | 1.6                 | 1.1-2.2      | 22%        | 2%-45%         | 29%        | 5%-54%         | 6           | 1-19             |
| Croatia        | 1.6                 | 1.3-2.5      | 63%        | 21%-85%        | 71%        | 21%-89%        | 52          | 21-84            |
| Cyprus         | 0.0                 | 0-0          | 0%         | 0%-0%          | 0%         | 0%-0%          | 0           | 0-0              |
| Czechia        | 2.3                 | 2-3          | 57%        | 36%-76%        | 64%        | 41%-80%        | 88          | 48-137           |
| Denmark        | 1.4                 | 0-2.2        | 38%        | 0%-70%         | 42%        | 0%-79%         | 4           | 0-7              |
| Estonia        | 1.5                 | 0-2.4        | 52%        | 0%-83%         | 61%        | 0%-89%         | 9           | 0-17             |
| Finland        | 1.8                 | 1.4-2.6      | 25%        | 8%-49%         | 26%        | 7%-43%         | 31          | 7-60             |
| France         | 2.2                 | 1.7-2.9      | 54%        | 33%-74%        | 64%        | 45%-81%        | 421         | 239-669          |
| Germany        | 2.6                 | 2.1-3.2      | 56%        | 38%-72%        | 56%        | 41%-72%        | 262         | 157-409          |
| Greece         | 1.1                 | 0-1.6        | 0%         | 0%-27%         | 0%         | 0%-34%         | 0           | 0-8              |
| Hungary        | 2.0                 | 1.4-2.6      | 37%        | 12%-65%        | 39%        | 13%-68%        | 43          | 12-92            |
| Ireland        | 1.8                 | 1.3-2.4      | 40%        | 12%-73%        | 45%        | 17%-80%        | 17          | 5-32             |
| Italy          | 2.4                 | 2-3.3        | 64%        | 41%-78%        | 71%        | 51%-84%        | 241         | 153-375          |
| Latvia         | 2.0                 | 1.3-2.9      | 55%        | 30%-81%        | 67%        | 36%-89%        | 39          | 15-70            |
| Lithuania      | 1.2                 | 0-1.7        | 2%         | 0%-47%         | 3%         | 0%-57%         | 1           | 0-29             |
| Luxembourg     | 2.6                 | 1.7-5.1      | 76%        | 50%-90%        | 84%        | 67%-93%        | 5           | 3-10             |
| Netherlands    | 2.9                 | 1.8-4.7      | 24%        | 3%-56%         | 26%        | 6%-61%         | 9           | 2-17             |
| Poland         | 1.6                 | 1.3-1.8      | 13%        | 4%-34%         | 15%        | 5%-37%         | 43          | 10-121           |
| Portugal       | 1.4                 | 0-1.9        | 4%         | 0%-14%         | 3%         | 0%-8%          | 1           | 0-2              |
| Romania        | 1.9                 | 1.4-2.5      | 19%        | 2%-38%         | 15%        | 3%-36%         | 26          | 3-64             |
| Slovakia       | 2.4                 | 1.9-3.4      | 43%        | 18%-68%        | 46%        | 20%-70%        | 22          | 9-50             |
| Slovenia       | 1.5                 | 1.2-2        | 33%        | 9%-75%         | 38%        | 10%-80%        | 11          | 3-22             |
| Spain          | 1.9                 | 1.6-2.2      | 9%         | 5%-17%         | 6%         | 3%-14%         | 21          | 9-47             |
| Sweden         | 2.8                 | 1.9-4        | 38%        | 17%-55%        | 39%        | 19%-53%        | 41          | 16-74            |
| United Kingdom | 2.8                 | 2.2-4.5      | 74%        | 60%-85%        | 76%        | 62%-86%        | 189         | 132-301          |
| <b>EU+UK</b>   | <b>2.4</b>          | <b>2-3.1</b> | <b>49%</b> | <b>34%-66%</b> | <b>52%</b> | <b>37%-67%</b> | <b>1857</b> | <b>1139-2930</b> |

*Table S8. Overview of key adaptation results based on flood proofing of buildings at country level for the 1.5°C warming scenario in 2100. The Benefit-Cost Ratio (BCR) is calculated as ratio of discounted benefits and costs over the period 2020-2100. Reduction (in %) in expected annual damage (EAD) is calculated as difference in undiscounted damage in 2100 with and without adaptation. Note that reduction in population exposed (EAPE) is not calculated (nc). Cost of implementation (in €million/year) reflect average of undiscounted costs over the period 2020-2100. All variables include the ensemble median and the first/third quartile (Q1-Q3).*

| Country        | Flood proofing of buildings |              |             |                  |           |           |             |               |
|----------------|-----------------------------|--------------|-------------|------------------|-----------|-----------|-------------|---------------|
|                | BCR                         |              | EAD red.    |                  | EAPE red. |           | Costs €/y   |               |
|                | med                         | Q1-Q3        | med         | Q1-Q3            | med       | Q1-Q3     | med         | Q1-Q3         |
| Austria        | 1.8                         | 1.3-3.8      | 0.0%        | 0.0%-0.2%        | nc        | nc        | 0.0         | 0-0.9         |
| Belgium        | 1.9                         | 1.3-24.7     | 0.0%        | 0.0%-0.3%        | nc        | nc        | 0.0         | 0-1           |
| Bulgaria       | 1.8                         | 1.5-2.1      | 0.3%        | 0.2%-1.2%        | nc        | nc        | 0.1         | 0.1-0.8       |
| Croatia        | 2.0                         | 1.6-2.6      | 0.4%        | 0.3%-0.5%        | nc        | nc        | 0.3         | 0.3-0.7       |
| Cyprus         | 0.0                         | 0-1          | 0.0%        | 0.0%-0.4%        | nc        | nc        | 0.0         | 0-0           |
| Czechia        | 1.9                         | 1.6-2.9      | 0.3%        | 0.1%-1.2%        | nc        | nc        | 0.6         | 0.1-5.2       |
| Denmark        | 0.0                         | 0-1.2        | 0.0%        | 0.0%-1.2%        | nc        | nc        | 0.0         | 0-0.2         |
| Estonia        | 2.4                         | 1.7-3.7      | 0.3%        | 0.2%-0.8%        | nc        | nc        | 0.0         | 0-0.4         |
| Finland        | 2.2                         | 1.6-3.3      | 0.1%        | 0.1%-0.9%        | nc        | nc        | 0.1         | 0-1.7         |
| France         | 2.0                         | 1.6-3.1      | 0.1%        | 0.0%-0.3%        | nc        | nc        | 0.8         | 0.2-6.4       |
| Germany        | 3.4                         | 2-5          | 0.1%        | 0.1%-0.2%        | nc        | nc        | 0.3         | 0.1-2.5       |
| Greece         | 3.0                         | 2.4-3.9      | 0.3%        | 0.2%-0.4%        | nc        | nc        | 0.0         | 0-0.1         |
| Hungary        | 1.5                         | 1.1-3.5      | 0.0%        | 0.0%-0.2%        | nc        | nc        | 0.0         | 0-0.5         |
| Ireland        | 1.6                         | 1.5-1.9      | 0.5%        | 0.1%-1.8%        | nc        | nc        | 0.3         | 0-1.4         |
| Italy          | 2.0                         | 1.8-2.2      | 0.5%        | 0.3%-3.0%        | nc        | nc        | 2.8         | 1.1-17.5      |
| Latvia         | 2.1                         | 1.7-2.6      | 0.3%        | 0.1%-1.2%        | nc        | nc        | 0.3         | 0.1-1.4       |
| Lithuania      | 5.5                         | 1.6-12.9     | 0.2%        | 0.1%-1.1%        | nc        | nc        | 0.0         | 0-1           |
| Luxembourg     | 0.0                         | 0-1.4        | 0.0%        | 0.0%-0.0%        | nc        | nc        | 0.0         | 0-0           |
| Netherlands    | 0.0                         | 0-0          | 0.0%        | 0.0%-0.0%        | nc        | nc        | 0.0         | 0-0           |
| Poland         | 3.7                         | 1.8-4.7      | 0.1%        | 0.1%-0.4%        | nc        | nc        | 0.1         | 0.1-1.7       |
| Portugal       | 4.4                         | 3.1-6.1      | 0.3%        | 0.2%-0.5%        | nc        | nc        | 0.0         | 0-0.1         |
| Romania        | 2.6                         | 2.1-3.1      | 0.7%        | 0.5%-0.8%        | nc        | nc        | 0.8         | 0.6-1.4       |
| Slovakia       | 2.6                         | 1.3-4.8      | 0.0%        | 0.0%-0.0%        | nc        | nc        | 0.0         | 0-0           |
| Slovenia       | 3.0                         | 1.9-5.2      | 0.2%        | 0.2%-0.4%        | nc        | nc        | 0.0         | 0-0           |
| Spain          | 3.0                         | 2.6-3.5      | 1.0%        | 0.7%-10.8%       | nc        | nc        | 1.6         | 0.8-15.7      |
| Sweden         | 2.3                         | 1.7-3.1      | 0.9%        | 0.2%-2.8%        | nc        | nc        | 1.7         | 0.2-11.3      |
| United Kingdom | 2.4                         | 1.9-3.5      | 6.4%        | 4.8%-17.1%       | nc        | nc        | 16.4        | 11.7-130.7    |
| <b>EU+UK</b>   | <b>2.3</b>                  | <b>2-2.9</b> | <b>0.9%</b> | <b>0.7%-5.0%</b> | <b>nc</b> | <b>nc</b> | <b>37.3</b> | <b>18-336</b> |

*Table S9. Overview of key adaptation results based on relocation at country level for the 1.5°C warming scenario in 2100. The Benefit-Cost Ratio (BCR) is calculated as ratio of discounted benefits and costs over the period 2020-2100. Reduction (in %) in expected annual damage (EAD) and population exposed (EAPE) are calculated as difference in undiscounted damage and population exposed in 2100 with and without adaptation. Cost of implementation (in €million/year) reflect average of undiscounted costs over the period 2020-2100. All variables include the ensemble median and the first/third quartile (Q1-Q3).*

| Country        | Relocation |                |             |                  |             |                  |            |            |
|----------------|------------|----------------|-------------|------------------|-------------|------------------|------------|------------|
|                | BCR        |                | EAD red.    |                  | EAPE red.   |                  | Costs €M/y |            |
|                | med        | Q1-Q3          | med         | Q1-Q3            | med         | Q1-Q3            | med        | Q1-Q3      |
| Austria        | 0.0        | 0-0            | 0.0%        | 0.0%-0.0%        | 0.0%        | 0.0%-0.0%        | 0.0        | 0-0        |
| Belgium        | 0.0        | 0-16.3         | 0.0%        | 0.0%-0.1%        | 0.0%        | 0.0%-0.0%        | 0.0        | 0-0        |
| Bulgaria       | 0.5        | 0-1.9          | 0.0%        | 0.0%-0.0%        | 0.0%        | 0.0%-0.0%        | 0.0        | 0-0        |
| Croatia        | 0.0        | 0-0            | 0.0%        | 0.0%-0.0%        | 0.0%        | 0.0%-0.0%        | 0.0        | 0-0        |
| Cyprus         | 0.0        | 0-0            | 0.0%        | 0.0%-0.0%        | 0.0%        | 0.0%-0.0%        | 0.0        | 0-0        |
| Czechia        | 3.0        | 2.3-3.7        | 0.0%        | 0.0%-0.1%        | 0.0%        | 0.0%-0.1%        | 0.0        | 0-0.1      |
| Denmark        | 0.0        | 0-0            | 0.0%        | 0.0%-0.0%        | 0.1%        | 0.1%-0.1%        | 0.0        | 0-0        |
| Estonia        | 149.5      | 73.5-291       | 0.1%        | 0.1%-0.1%        | 0.1%        | 0.0%-0.1%        | 0.0        | 0-0        |
| Finland        | 14.3       | 7.1-25.3       | 0.0%        | 0.0%-0.0%        | 0.1%        | 0.1%-0.1%        | 0.0        | 0-0        |
| France         | 4.6        | 2.5-5.8        | 0.0%        | 0.0%-0.0%        | 0.0%        | 0.0%-0.0%        | 0.1        | 0-0.1      |
| Germany        | 4.5        | 3.3-6          | 0.0%        | 0.0%-0.1%        | 0.0%        | 0.0%-0.1%        | 0.1        | 0-0.3      |
| Greece         | 2.0        | 1.5-3          | 0.1%        | 0.0%-0.2%        | 0.0%        | 0.0%-0.0%        | 0.0        | 0-0        |
| Hungary        | 0.0        | 0-6.6          | 0.0%        | 0.0%-0.0%        | 0.0%        | 0.0%-0.0%        | 0.0        | 0-0        |
| Ireland        | 32.5       | 19.3-56.3      | 0.0%        | 0.0%-0.0%        | 0.1%        | 0.1%-0.1%        | 0.0        | 0-0        |
| Italy          | 1.9        | 0-33.2         | 0.0%        | 0.0%-0.1%        | 0.0%        | 0.0%-0.0%        | 0.0        | 0-0.1      |
| Latvia         | 4.6        | 2.3-6.8        | 0.0%        | 0.0%-0.1%        | 0.0%        | 0.0%-0.1%        | 0.0        | 0-0.1      |
| Lithuania      | 10.6       | 5.7-78.2       | 0.1%        | 0.1%-0.1%        | 0.1%        | 0.1%-0.2%        | 0.0        | 0-0        |
| Luxembourg     | 0.0        | 0-0            | 0.0%        | 0.0%-0.0%        | 0.0%        | 0.0%-0.0%        | 0.0        | 0-0        |
| Netherlands    | 0.0        | 0-0            | 0.0%        | 0.0%-0.0%        | 0.0%        | 0.0%-0.0%        | 0.0        | 0-0        |
| Poland         | 5.3        | 4.4-7.1        | 0.0%        | 0.0%-0.1%        | 0.1%        | 0.0%-0.1%        | 0.0        | 0-0.1      |
| Portugal       | 6.0        | 3.4-8.9        | 0.2%        | 0.2%-0.3%        | 0.2%        | 0.2%-0.3%        | 0.0        | 0-0        |
| Romania        | 2.1        | 1.5-3          | 0.0%        | 0.0%-0.1%        | 0.0%        | 0.0%-0.0%        | 0.0        | 0-0.1      |
| Slovakia       | 0.0        | 0-1.5          | 0.0%        | 0.0%-0.0%        | 0.0%        | 0.0%-0.0%        | 0.0        | 0-0        |
| Slovenia       | 0.0        | 0-0            | 0.1%        | 0.0%-0.2%        | 0.1%        | 0.0%-0.1%        | 0.0        | 0-0        |
| Spain          | 3.2        | 2.6-5.2        | 0.4%        | 0.2%-0.6%        | 0.1%        | 0.0%-0.8%        | 0.4        | 0.1-1.1    |
| Sweden         | 4.2        | 3.1-5.7        | 0.1%        | 0.1%-0.2%        | 0.1%        | 0.1%-0.1%        | 0.1        | 0-0.2      |
| United Kingdom | 2.2        | 1.8-2.7        | 0.2%        | 0.1%-0.3%        | 0.2%        | 0.1%-0.3%        | 0.6        | 0.3-1.1    |
| <b>EU+UK</b>   | <b>3.1</b> | <b>2.7-3.5</b> | <b>0.1%</b> | <b>0.0%-0.1%</b> | <b>0.0%</b> | <b>0.0%-0.1%</b> | <b>1.7</b> | <b>1-4</b> |

*Table S10. Overview of key adaptation results based on detention areas at country level for the 2°C warming scenario in 2100. The Benefit-Cost Ratio (BCR) is calculated as ratio of discounted benefits and costs over the period 2020-2100. Reduction (in %) in expected annual damage (EAD) and population exposed (EAPE) are calculated as difference in undiscounted damage and population exposed in 2100 with and without adaptation. Cost of implementation (in €million/year) reflect average of undiscounted costs over the period 2020-2100. All variables include the ensemble median (med) and the first/third quartile (Q1-Q3).*

| Country        | Detention areas |                |            |                |            |                |             |                  |
|----------------|-----------------|----------------|------------|----------------|------------|----------------|-------------|------------------|
|                | BCR             |                | EAD red.   |                | EAPE red.  |                | Costs €M/y  |                  |
|                | med             | Q1-Q3          | med        | Q1-Q3          | med        | Q1-Q3          | med         | Q1-Q3            |
| Austria        | 3.0             | 2.2-4.8        | 74%        | 51%-86%        | 80%        | 62%-89%        | 62          | 42-118           |
| Belgium        | 4.9             | 3.4-7.9        | 84%        | 69%-92%        | 87%        | 75%-94%        | 55          | 35-95            |
| Bulgaria       | 3.0             | 2.3-4.4        | 74%        | 57%-87%        | 78%        | 59%-90%        | 17          | 10-26            |
| Croatia        | 3.8             | 2.4-7.5        | 91%        | 83%-95%        | 94%        | 87%-96%        | 56          | 24-83            |
| Cyprus         | 0.0             | 0-0            | 0%         | 0%-0%          | 0%         | 0%-0%          | 3           | 1-3              |
| Czechia        | 4.3             | 3.3-6          | 83%        | 71%-91%        | 88%        | 78%-93%        | 74          | 53-107           |
| Denmark        | 3.9             | 2.6-6.5        | 89%        | 75%-94%        | 91%        | 81%-95%        | 4           | 2-7              |
| Estonia        | 1.3             | 0-2.1          | 16%        | 0%-69%         | 27%        | 0%-78%         | 3           | 0-19             |
| Finland        | 3.3             | 2.2-5.1        | 61%        | 40%-76%        | 56%        | 42%-72%        | 50          | 25-86            |
| France         | 3.6             | 2.7-5.6        | 82%        | 68%-90%        | 87%        | 77%-93%        | 450         | 302-767          |
| Germany        | 3.8             | 3.2-4.9        | 74%        | 60%-86%        | 76%        | 61%-88%        | 280         | 182-425          |
| Greece         | 2.8             | 2-4            | 68%        | 47%-81%        | 69%        | 53%-82%        | 11          | 7-17             |
| Hungary        | 3.1             | 2.1-5.2        | 84%        | 66%-91%        | 86%        | 71%-93%        | 67          | 47-123           |
| Ireland        | 2.6             | 2-3.9          | 75%        | 50%-88%        | 81%        | 56%-91%        | 22          | 14-35            |
| Italy          | 5.2             | 3.7-8.1        | 83%        | 73%-89%        | 88%        | 81%-92%        | 168         | 118-270          |
| Latvia         | 2.8             | 1.7-4.4        | 41%        | 21%-71%        | 48%        | 29%-80%        | 26          | 6-55             |
| Lithuania      | 1.8             | 1.1-2.9        | 19%        | 1%-61%         | 30%        | 2%-70%         | 7           | 0-26             |
| Luxembourg     | 4.1             | 2.3-7.4        | 83%        | 65%-92%        | 88%        | 76%-95%        | 6           | 3-10             |
| Netherlands    | 4.4             | 2.9-6.5        | 37%        | 10%-59%        | 40%        | 14%-61%        | 10          | 4-28             |
| Poland         | 2.4             | 2-3.2          | 64%        | 41%-80%        | 66%        | 46%-82%        | 145         | 83-228           |
| Portugal       | 1.9             | 1.4-2.5        | 9%         | 3%-21%         | 10%        | 4%-16%         | 1           | 0-4              |
| Romania        | 2.6             | 2-3.3          | 51%        | 32%-72%        | 57%        | 38%-73%        | 63          | 33-118           |
| Slovakia       | 3.6             | 2.7-5.6        | 80%        | 61%-90%        | 85%        | 67%-92%        | 31          | 21-57            |
| Slovenia       | 2.5             | 1.7-3.9        | 78%        | 57%-89%        | 82%        | 62%-92%        | 14          | 10-27            |
| Spain          | 2.2             | 1.9-2.6        | 28%        | 13%-52%        | 34%        | 11%-57%        | 59          | 20-124           |
| Sweden         | 4.0             | 2.4-6.1        | 71%        | 50%-82%        | 72%        | 56%-83%        | 78          | 46-131           |
| United Kingdom | 7.7             | 5.3-13.7       | 87%        | 80%-92%        | 88%        | 82%-94%        | 124         | 67-179           |
| <b>EU+UK</b>   | <b>4.0</b>      | <b>3.3-5.7</b> | <b>75%</b> | <b>65%-83%</b> | <b>78%</b> | <b>69%-86%</b> | <b>1957</b> | <b>1377-2799</b> |



*Table S11. Overview of key adaptation results based on dikes strengthening at country level for the 2°C warming scenario in 2100. The Benefit-Cost Ratio (BCR) is calculated as ratio of discounted benefits and costs over the period 2020-2100. Reduction (in %) in expected annual damage (EAD) and population exposed (EAPE) are calculated as difference in undiscounted damage and population exposed in 2100 with and without adaptation. Cost of implementation (in €million/year) reflect average of undiscounted costs over the period 2020-2100. All variables include the ensemble median and the first/third quartile.*

| Country        | Dikes strengthening |                |            |                |            |                |             |                  |
|----------------|---------------------|----------------|------------|----------------|------------|----------------|-------------|------------------|
|                | BCR                 |                | EAD red.   |                | EAPE red.  |                | Costs €M/y  |                  |
|                | med                 | Q1-Q3          | med        | Q1-Q3          | med        | Q1-Q3          | med         | Q1-Q3            |
| Austria        | 2.1                 | 1.6-3.2        | 57%        | 26%-76%        | 61%        | 27%-80%        | 75          | 33-122           |
| Belgium        | 3.6                 | 2.4-6          | 81%        | 62%-91%        | 85%        | 70%-93%        | 69          | 44-121           |
| Bulgaria       | 1.8                 | 1.4-2.5        | 29%        | 7%-51%         | 36%        | 11%-60%        | 8           | 2-23             |
| Croatia        | 1.8                 | 1.4-2.8        | 72%        | 40%-89%        | 79%        | 43%-92%        | 66          | 40-109           |
| Cyprus         | 0.0                 | 0-0            | 0%         | 0%-0%          | 0%         | 0%-0%          | 0           | 0-0              |
| Czechia        | 2.5                 | 2-3.3          | 63%        | 43%-80%        | 68%        | 47%-84%        | 100         | 59-158           |
| Denmark        | 1.6                 | 1.1-2.5        | 54%        | 11%-77%        | 59%        | 19%-84%        | 6           | 1-9              |
| Estonia        | 1.6                 | 0-2.6          | 58%        | 0%-86%         | 70%        | 0%-91%         | 10          | 0-20             |
| Finland        | 2.4                 | 1.8-3.5        | 44%        | 25%-62%        | 45%        | 27%-61%        | 52          | 20-97            |
| France         | 2.7                 | 2-3.7          | 67%        | 47%-82%        | 76%        | 58%-88%        | 554         | 348-839          |
| Germany        | 3.0                 | 2.3-3.9        | 66%        | 50%-79%        | 66%        | 52%-80%        | 340         | 210-508          |
| Greece         | 1.3                 | 0-1.8          | 3%         | 0%-38%         | 5%         | 0%-43%         | 0           | 0-13             |
| Hungary        | 2.3                 | 1.5-3.1        | 52%        | 21%-73%        | 53%        | 22%-75%        | 66          | 21-129           |
| Ireland        | 1.9                 | 1.4-2.7        | 52%        | 18%-79%        | 58%        | 24%-85%        | 24          | 9-39             |
| Italy          | 2.7                 | 2.1-3.6        | 68%        | 49%-81%        | 74%        | 57%-86%        | 272         | 171-415          |
| Latvia         | 2.1                 | 1.3-3.2        | 62%        | 29%-85%        | 72%        | 35%-91%        | 45          | 17-80            |
| Lithuania      | 1.3                 | 0-1.8          | 7%         | 0%-59%         | 11%        | 0%-63%         | 4           | 0-39             |
| Luxembourg     | 3.0                 | 1.9-6          | 82%        | 62%-92%        | 88%        | 73%-96%        | 6           | 3-12             |
| Netherlands    | 3.6                 | 2.2-6.9        | 41%        | 9%-77%         | 45%        | 13%-80%        | 13          | 6-27             |
| Poland         | 1.6                 | 1.4-2          | 20%        | 7%-45%         | 23%        | 8%-49%         | 68          | 21-178           |
| Portugal       | 1.4                 | 0-1.9          | 4%         | 0%-17%         | 4%         | 0%-9%          | 1           | 0-3              |
| Romania        | 2.1                 | 1.4-2.7        | 31%        | 7%-50%         | 26%        | 6%-46%         | 41          | 9-93             |
| Slovakia       | 2.3                 | 1.8-3.4        | 47%        | 19%-72%        | 51%        | 21%-73%        | 29          | 11-64            |
| Slovenia       | 1.6                 | 1.3-2.3        | 47%        | 15%-79%        | 53%        | 17%-83%        | 16          | 4-26             |
| Spain          | 1.9                 | 1.5-2.2        | 9%         | 4%-20%         | 6%         | 3%-20%         | 22          | 9-58             |
| Sweden         | 4.3                 | 2.9-6.7        | 62%        | 37%-74%        | 59%        | 41%-72%        | 66          | 35-111           |
| United Kingdom | 3.3                 | 2.4-5.4        | 79%        | 67%-88%        | 81%        | 69%-89%        | 213         | 150-354          |
| <b>EU+UK</b>   | <b>2.8</b>          | <b>2.4-3.8</b> | <b>60%</b> | <b>46%-74%</b> | <b>62%</b> | <b>49%-75%</b> | <b>2378</b> | <b>1551-3542</b> |

*Table S12. Overview of key adaptation results based on flood proofing of buildings at country level for the 2°C warming scenario in 2100. The Benefit-Cost Ratio (BCR) is calculated as ratio of discounted benefits and costs over the period 2020-2100. Reduction (in %) in expected annual damage (EAD) is calculated as difference in undiscounted damage in 2100 with and without adaptation. Note that reduction in population exposed (EAPE) is not calculated (nc). Cost of implementation (in €million/year) reflect average of undiscounted costs over the period 2020-2100. All variables include the ensemble median and the first/third quartile.*

| Country        | Flood proofing of buildings |              |           |               |           |              |              |                |
|----------------|-----------------------------|--------------|-----------|---------------|-----------|--------------|--------------|----------------|
|                | BCR                         |              | EAD red.  |               | EAPE red. |              | Costs €/y    |                |
|                | med                         | Q1-Q3        | med       | Q1-Q3         | med       | Q1-Q3        | med          | Q1-Q3          |
| Austria        | 1.5                         | 1.3-2.7      | 0.0%      | 0.0%-0.4%     | nc        | nc-nc        | 0.1          | 0-1.4          |
| Belgium        | 1.6                         | 1.3-11.6     | 0.2%      | 0.0%-12.5%    | nc        | nc-nc        | 0.7          | 0-48.9         |
| Bulgaria       | 1.8                         | 1.5-2.2      | 0.8%      | 0.2%-2.1%     | nc        | nc-nc        | 0.4          | 0.1-2.1        |
| Croatia        | 1.9                         | 1.6-2.4      | 0.4%      | 0.3%-0.8%     | nc        | nc-nc        | 0.4          | 0.3-2.1        |
| Cyprus         | 0.0                         | 0-0          | 0.0%      | 0.0%-0.0%     | nc        | nc-nc        | 0.0          | 0-0            |
| Czechia        | 1.8                         | 1.5-2.4      | 0.7%      | 0.1%-19.3%    | nc        | nc-nc        | 2.0          | 0.1-69.3       |
| Denmark        | 1.1                         | 0-1.5        | 0.3%      | 0.0%-1.9%     | nc        | nc-nc        | 0.1          | 0-0.6          |
| Estonia        | 2.5                         | 1.7-4.6      | 0.4%      | 0.2%-2.3%     | nc        | nc-nc        | 0.0          | 0-1.3          |
| Finland        | 2.2                         | 1.6-3.7      | 1.1%      | 0.1%-2.9%     | nc        | nc-nc        | 2.4          | 0.1-11.5       |
| France         | 1.7                         | 1.5-2.2      | 0.3%      | 0.1%-3.0%     | nc        | nc-nc        | 5.5          | 0.7-63.1       |
| Germany        | 2.2                         | 1.7-3.7      | 0.2%      | 0.1%-0.6%     | nc        | nc-nc        | 1.2          | 0.2-9.8        |
| Greece         | 3.0                         | 2.2-4.3      | 0.3%      | 0.2%-0.5%     | nc        | nc-nc        | 0.0          | 0-0.1          |
| Hungary        | 1.6                         | 1.2-2.8      | 0.1%      | 0.0%-0.8%     | nc        | nc-nc        | 0.2          | 0-4.2          |
| Ireland        | 1.6                         | 1.4-2        | 1.0%      | 0.3%-2.3%     | nc        | nc-nc        | 0.8          | 0.1-2.4        |
| Italy          | 1.9                         | 1.7-2.2      | 0.6%      | 0.3%-5.1%     | nc        | nc-nc        | 4.7          | 1.5-50.5       |
| Latvia         | 2.1                         | 1.6-2.6      | 0.5%      | 0.2%-2.2%     | nc        | nc-nc        | 0.4          | 0.1-3.8        |
| Lithuania      | 2.6                         | 1.6-9.5      | 0.2%      | 0.1%-1.7%     | nc        | nc-nc        | 0.1          | 0-1.5          |
| Luxembourg     | 1.2                         | 0-1.6        | 0.0%      | 0.0%-2.0%     | nc        | nc-nc        | 0.0          | 0-0.8          |
| Netherlands    | 0.0                         | 0-0          | 0.0%      | 0.0%-0.0%     | nc        | nc-nc        | 0.0          | 0-0            |
| Poland         | 2.7                         | 1.6-4.3      | 0.1%      | 0.1%-0.7%     | nc        | nc-nc        | 0.3          | 0.1-4.6        |
| Portugal       | 4.5                         | 3-6.3        | 0.3%      | 0.2%-0.5%     | nc        | nc-nc        | 0.0          | 0-0.1          |
| Romania        | 2.6                         | 2.2-3.1      | 1.0%      | 0.5%-1.6%     | nc        | nc-nc        | 1.3          | 0.6-5.1        |
| Slovakia       | 2.1                         | 1.4-4.3      | 0.0%      | 0.0%-0.1%     | nc        | nc-nc        | 0.0          | 0-0            |
| Slovenia       | 2.5                         | 1.8-4.2      | 0.3%      | 0.2%-0.8%     | nc        | nc-nc        | 0.0          | 0-0.4          |
| Spain          | 3.0                         | 2.6-3.5      | 1.1%      | 0.8%-13.7%    | nc        | nc-nc        | 1.9          | 0.9-23.4       |
| Sweden         | 2.6                         | 1.9-3.9      | 35%       | 1.1%-63.1%    | nc        | nc-nc        | 70.8         | 3.2-172.5      |
| United Kingdom | 2.2                         | 1.8-2.9      | 12%       | 5.4%-42.3%    | nc        | nc-nc        | 60.4         | 15.8-415.6     |
| <b>EU+UK</b>   | <b>2.3</b>                  | <b>2-2.7</b> | <b>6%</b> | <b>1%-16%</b> | <b>nc</b> | <b>nc-nc</b> | <b>336.7</b> | <b>70-1220</b> |

*Table S13. Overview of key adaptation results based on relocation at country level for the 2°C warming scenario in 2100. The Benefit-Cost Ratio (BCR) is calculated as ratio of discounted benefits and costs over the period 2020-2100. Reduction (in %) in expected annual damage (EAD) and population exposed (EAPE) are calculated as difference in undiscounted damage and population exposed in 2100 with and without adaptation. Cost of implementation (in €million/year) reflect average of undiscounted costs over the period 2020-2100. All variables include the ensemble median and the first/third quartile.*

| Country        | Relocation |              |             |                  |             |                  |            |             |
|----------------|------------|--------------|-------------|------------------|-------------|------------------|------------|-------------|
|                | BCR        |              | EAD red.    |                  | EAPE red.   |                  | Costs €M/y |             |
|                | med        | Q1-Q3        | med         | Q1-Q3            | med         | Q1-Q3            | med        | Q1-Q3       |
| Austria        | 0.0        | 0-0          | 0.0%        | 0.0%-0.0%        | 0.0%        | 0.0%-0.0%        | 0.0        | 0-0         |
| Belgium        | 0.0        | 0-19.9       | 0.0%        | 0.0%-0.1%        | 0.0%        | 0.0%-0.0%        | 0.0        | 0-0         |
| Bulgaria       | 1.4        | 0-2          | 0.0%        | 0.0%-0.1%        | 0.0%        | 0.0%-0.0%        | 0.0        | 0-0         |
| Croatia        | 0.0        | 0-1.1        | 0.0%        | 0.0%-0.0%        | 0.0%        | 0.0%-0.0%        | 0.0        | 0-0         |
| Cyprus         | 0.0        | 0-0          | 0.0%        | 0.0%-0.0%        | 0.0%        | 0.0%-0.0%        | 0.0        | 0-0         |
| Czechia        | 2.8        | 2.2-3.6      | 0.0%        | 0.0%-0.1%        | 0.0%        | 0.0%-0.1%        | 0.0        | 0-0.2       |
| Denmark        | 0.0        | 0-0          | 0.0%        | 0.0%-0.0%        | 0.1%        | 0.1%-0.1%        | 0.0        | 0-0         |
| Estonia        | 160.6      | 57.1-372     | 0.1%        | 0.1%-0.1%        | 0.1%        | 0.1%-0.1%        | 0.0        | 0-0         |
| Finland        | 7.3        | 3.6-19.5     | 0.0%        | 0.0%-0.1%        | 0.1%        | 0.1%-0.2%        | 0.0        | 0-0         |
| France         | 4.3        | 2.8-6        | 0.0%        | 0.0%-0.0%        | 0.0%        | 0.0%-0.0%        | 0.1        | 0-0.3       |
| Germany        | 4.4        | 3.3-6        | 0.0%        | 0.0%-0.1%        | 0.0%        | 0.0%-0.1%        | 0.1        | 0-0.3       |
| Greece         | 2.2        | 1.7-3.3      | 0.2%        | 0.0%-0.3%        | 0.0%        | 0.0%-0.0%        | 0.0        | 0-0.1       |
| Hungary        | 0.0        | 0-11.7       | 0.0%        | 0.0%-0.0%        | 0.0%        | 0.0%-0.0%        | 0.0        | 0-0         |
| Ireland        | 25.5       | 3-43.1       | 0.0%        | 0.0%-0.0%        | 0.1%        | 0.1%-0.1%        | 0.0        | 0-0         |
| Italy          | 1.8        | 0-21.8       | 0.0%        | 0.0%-0.1%        | 0.0%        | 0.0%-0.0%        | 0.0        | 0-0.5       |
| Latvia         | 3.7        | 2.1-6.7      | 0.0%        | 0.0%-0.1%        | 0.0%        | 0.0%-0.1%        | 0.0        | 0-0.1       |
| Lithuania      | 8.8        | 3.4-70.8     | 0.1%        | 0.0%-0.1%        | 0.1%        | 0.1%-0.1%        | 0.0        | 0-0         |
| Luxembourg     | 0.0        | 0-0          | 0.0%        | 0.0%-0.0%        | 0.0%        | 0.0%-0.0%        | 0.0        | 0-0         |
| Netherlands    | 0.0        | 0-0          | 0.0%        | 0.0%-0.0%        | 0.0%        | 0.0%-0.0%        | 0.0        | 0-0         |
| Poland         | 5.3        | 4-7.7        | 0.0%        | 0.0%-0.1%        | 0.1%        | 0.0%-0.1%        | 0.0        | 0-0.1       |
| Portugal       | 5.8        | 3.5-8.6      | 0.2%        | 0.2%-0.3%        | 0.3%        | 0.2%-0.3%        | 0.0        | 0-0         |
| Romania        | 2.0        | 1.4-2.7      | 0.1%        | 0.0%-0.7%        | 0.0%        | 0.0%-0.1%        | 0.1        | 0-1.4       |
| Slovakia       | 0.0        | 0-1.7        | 0.0%        | 0.0%-0.0%        | 0.0%        | 0.0%-0.0%        | 0.0        | 0-0         |
| Slovenia       | 0.0        | 0-2.4        | 0.1%        | 0.0%-0.2%        | 0.1%        | 0.0%-0.1%        | 0.0        | 0-0         |
| Spain          | 3.2        | 2.6-5        | 0.4%        | 0.2%-0.7%        | 0.1%        | 0.0%-0.8%        | 0.5        | 0.1-1.2     |
| Sweden         | 3.0        | 2.1-4.7      | 0.2%        | 0.1%-0.3%        | 0.1%        | 0.1%-0.2%        | 0.2        | 0-0.5       |
| United Kingdom | 2.2        | 1.9-2.7      | 0.2%        | 0.1%-0.3%        | 0.2%        | 0.1%-0.3%        | 0.7        | 0.3-1.4     |
| <b>EU+UK</b>   | <b>2.6</b> | <b>2-3.1</b> | <b>0.1%</b> | <b>0.1%-0.2%</b> | <b>0.1%</b> | <b>0.0%-0.1%</b> | <b>4.1</b> | <b>1-10</b> |

*Table S14. Overview of key adaptation results based on detention areas at country level for the 3°C warming scenario in 2100. The Benefit-Cost Ratio (BCR) is calculated as ratio of discounted benefits and costs over the period 2020-2100. Reduction (in %) in expected annual damage (EAD) and population exposed (EAPE) are calculated as difference in undiscounted damage and population exposed in 2100 with and without adaptation. Cost of implementation (in €million/year) reflect average of undiscounted costs over the period 2020-2100. All variables include the ensemble median (med) and the first/third quartile (Q1-Q3).*

| Country        | Detention areas |                |            |                |            |                |             |                  |
|----------------|-----------------|----------------|------------|----------------|------------|----------------|-------------|------------------|
|                | BCR             |                | EAD red.   |                | EAPE red.  |                | Costs €M/y  |                  |
|                | med             | Q1-Q3          | med        | Q1-Q3          | med        | Q1-Q3          | med         | Q1-Q3            |
| Austria        | 3.3             | 2.4-5.2        | 83%        | 69%-91%        | 87%        | 75%-93%        | 88          | 58-146           |
| Belgium        | 4.8             | 3.3-7.8        | 89%        | 79%-94%        | 91%        | 83%-95%        | 82          | 52-123           |
| Bulgaria       | 3.5             | 2.6-5          | 80%        | 62%-91%        | 82%        | 67%-92%        | 19          | 12-29            |
| Croatia        | 4.0             | 2.3-7.5        | 96%        | 92%-97%        | 97%        | 95%-98%        | 74          | 32-110           |
| Cyprus         | 0.0             | 0-0            | 0%         | 0%-0%          | 0%         | 0%-0%          | 3           | 1-3              |
| Czechia        | 4.9             | 3.9-6.9        | 87%        | 77%-93%        | 90%        | 81%-95%        | 88          | 61-130           |
| Denmark        | 4.1             | 2.5-6.8        | 92%        | 81%-96%        | 93%        | 86%-97%        | 6           | 3-9              |
| Estonia        | 1.3             | 0-2.3          | 59%        | 0%-86%         | 74%        | 0%-91%         | 11          | 0-26             |
| Finland        | 3.7             | 2.4-5.5        | 79%        | 59%-86%        | 76%        | 61%-86%        | 78          | 36-127           |
| France         | 3.5             | 2.7-5.4        | 86%        | 75%-93%        | 90%        | 81%-95%        | 544         | 373-907          |
| Germany        | 3.8             | 3.1-5.2        | 80%        | 63%-91%        | 82%        | 65%-92%        | 383         | 255-568          |
| Greece         | 2.7             | 2-4.5          | 69%        | 45%-85%        | 69%        | 50%-85%        | 13          | 7-20             |
| Hungary        | 3.8             | 2.5-6.5        | 92%        | 81%-96%        | 93%        | 85%-96%        | 105         | 60-172           |
| Ireland        | 3.5             | 2.4-5.4        | 87%        | 72%-94%        | 90%        | 74%-95%        | 31          | 22-53            |
| Italy          | 5.3             | 3.9-8.1        | 88%        | 79%-93%        | 92%        | 85%-95%        | 227         | 151-363          |
| Latvia         | 2.8             | 1.8-4.1        | 56%        | 35%-77%        | 69%        | 45%-85%        | 39          | 12-68            |
| Lithuania      | 1.8             | 1-2.5          | 34%        | 2%-71%         | 42%        | 4%-77%         | 10          | 0-37             |
| Luxembourg     | 4.0             | 2.5-6.7        | 88%        | 78%-94%        | 92%        | 85%-96%        | 7           | 5-11             |
| Netherlands    | 4.5             | 3.1-6.2        | 44%        | 27%-66%        | 48%        | 30%-68%        | 18          | 8-42             |
| Poland         | 2.6             | 2.1-3.5        | 72%        | 51%-85%        | 75%        | 54%-87%        | 184         | 120-294          |
| Portugal       | 1.8             | 1.3-2.4        | 7%         | 1%-18%         | 5%         | 1%-12%         | 1           | 0-3              |
| Romania        | 2.6             | 1.9-3.7        | 63%        | 38%-76%        | 63%        | 44%-76%        | 91          | 41-183           |
| Slovakia       | 3.9             | 3-6.2          | 87%        | 73%-93%        | 90%        | 79%-95%        | 43          | 27-65            |
| Slovenia       | 2.6             | 2-4.1          | 82%        | 63%-91%        | 85%        | 65%-92%        | 20          | 14-32            |
| Spain          | 2.1             | 1.7-2.6        | 33%        | 14%-58%        | 40%        | 13%-62%        | 70          | 26-140           |
| Sweden         | 5.7             | 3.4-8.5        | 85%        | 73%-91%        | 84%        | 74%-92%        | 113         | 66-180           |
| United Kingdom | 9.0             | 6.2-14.6       | 93%        | 89%-96%        | 94%        | 90%-97%        | 174         | 96-238           |
| <b>EU+UK</b>   | <b>4.2</b>      | <b>3.5-6.3</b> | <b>83%</b> | <b>74%-89%</b> | <b>84%</b> | <b>75%-90%</b> | <b>2567</b> | <b>1868-3787</b> |

*Table S15. Overview of key adaptation results based on dikes strengthening at country level for the 3°C warming scenario in 2100. The Benefit-Cost Ratio (BCR) is calculated as ratio of discounted benefits and costs over the period 2020-2100. Reduction (in %) in expected annual damage (EAD) and population exposed (EAPE) are calculated as difference in undiscounted damage and population exposed in 2100 with and without adaptation. Cost of implementation (in €million/year) reflect average of undiscounted costs over the period 2020-2100. All variables include the ensemble median and the first/third quartile.*

| Country        | Dikes strengthening |                |            |                |            |                |             |                  |
|----------------|---------------------|----------------|------------|----------------|------------|----------------|-------------|------------------|
|                | BCR                 |                | EAD red.   |                | EAPE red.  |                | Costs €M/y  |                  |
|                | med                 | Q1-Q3          | med        | Q1-Q3          | med        | Q1-Q3          | med         | Q1-Q3            |
| Austria        | 2.6                 | 1.9-4.1        | 70%        | 51%-85%        | 73%        | 56%-87%        | 104         | 55-164           |
| Belgium        | 3.9                 | 2.6-6.8        | 88%        | 77%-94%        | 91%        | 81%-95%        | 91          | 61-153           |
| Bulgaria       | 2.4                 | 1.8-3.3        | 35%        | 18%-61%        | 40%        | 21%-69%        | 11          | 3-30             |
| Croatia        | 2.1                 | 1.6-3.5        | 79%        | 52%-92%        | 84%        | 63%-95%        | 81          | 57-119           |
| Cyprus         | 0.0                 | 0-0            | 0%         | 0%-0%          | 0%         | 0%-0%          | 0           | 0-0              |
| Czechia        | 2.9                 | 2.3-3.8        | 72%        | 54%-85%        | 76%        | 60%-88%        | 131         | 78-200           |
| Denmark        | 1.8                 | 1.2-2.7        | 64%        | 18%-83%        | 70%        | 25%-87%        | 8           | 1-14             |
| Estonia        | 2.2                 | 1.3-3.4        | 74%        | 32%-92%        | 81%        | 41%-95%        | 12          | 4-21             |
| Finland        | 3.2                 | 2.5-4.4        | 65%        | 47%-78%        | 68%        | 48%-81%        | 83          | 25-141           |
| France         | 2.8                 | 2.2-4.2        | 74%        | 57%-87%        | 81%        | 66%-91%        | 634         | 421-924          |
| Germany        | 3.2                 | 2.5-4.3        | 74%        | 58%-86%        | 76%        | 59%-87%        | 454         | 289-672          |
| Greece         | 1.1                 | 0-1.7          | 2%         | 0%-49%         | 3%         | 0%-53%         | 1           | 0-23             |
| Hungary        | 3.0                 | 2.1-4.1        | 69%        | 48%-85%        | 71%        | 53%-85%        | 108         | 55-177           |
| Ireland        | 2.7                 | 1.9-3.8        | 74%        | 55%-89%        | 77%        | 56%-91%        | 37          | 25-56            |
| Italy          | 2.9                 | 2.1-4          | 76%        | 59%-87%        | 80%        | 67%-89%        | 373         | 245-553          |
| Latvia         | 2.2                 | 1.4-3.4        | 71%        | 42%-89%        | 80%        | 49%-94%        | 50          | 24-87            |
| Lithuania      | 1.6                 | 1.1-2.1        | 20%        | 0%-65%         | 33%        | 0%-71%         | 9           | 0-46             |
| Luxembourg     | 3.4                 | 2.1-6.1        | 90%        | 79%-95%        | 93%        | 85%-97%        | 8           | 5-13             |
| Netherlands    | 3.7                 | 2.4-7.3        | 57%        | 29%-84%        | 64%        | 31%-84%        | 25          | 13-46            |
| Poland         | 1.8                 | 1.5-2.2        | 34%        | 12%-60%        | 38%        | 14%-65%        | 127         | 44-289           |
| Portugal       | 1.4                 | 0-1.9          | 5%         | 0%-16%         | 3%         | 0%-7%          | 1           | 0-3              |
| Romania        | 2.4                 | 1.8-3.4        | 44%        | 17%-64%        | 37%        | 13%-58%        | 77          | 14-145           |
| Slovakia       | 2.6                 | 2-3.6          | 63%        | 42%-81%        | 65%        | 44%-83%        | 49          | 23-83            |
| Slovenia       | 1.7                 | 1.3-2.5        | 57%        | 19%-85%        | 60%        | 23%-88%        | 22          | 9-35             |
| Spain          | 1.7                 | 1.5-2.2        | 11%        | 5%-26%         | 6%         | 3%-31%         | 26          | 9-79             |
| Sweden         | 7.6                 | 4.7-11.2       | 79%        | 62%-86%        | 75%        | 62%-83%        | 85          | 41-151           |
| United Kingdom | 4.0                 | 2.9-6.4        | 88%        | 79%-94%        | 89%        | 81%-95%        | 296         | 202-459          |
| <b>EU+UK</b>   | <b>3.3</b>          | <b>2.7-4.5</b> | <b>70%</b> | <b>59%-83%</b> | <b>71%</b> | <b>60%-83%</b> | <b>3093</b> | <b>2090-4490</b> |

*Table S16. Overview of key adaptation results based on flood proofing of buildings at country level for the 3°C warming scenario in 2100. The Benefit-Cost Ratio (BCR) is calculated as ratio of discounted benefits and costs over the period 2020-2100. Reduction (in %) in expected annual damage (EAD) is calculated as difference in undiscounted damage in 2100 with and without adaptation. Note that reduction in population exposed (EAPE) is not calculated (nc). Cost of implementation (in €million/year) reflect average of undiscounted costs over the period 2020-2100. All variables include the ensemble median and the first/third quartile.*

| Country        | Flood proofing of buildings |              |            |               |           |              |             |                 |
|----------------|-----------------------------|--------------|------------|---------------|-----------|--------------|-------------|-----------------|
|                | BCR                         |              | EAD red.   |               | EAPE red. |              | Costs €/y   |                 |
|                | med                         | Q1-Q3        | med        | Q1-Q3         | med       | Q1-Q3        | med         | Q1-Q3           |
| Austria        | 1.6                         | 1.4-2        | 0.4%       | 0.1%-1.3%     | nc        | nc-nc        | 1.4         | 0.1-7.7         |
| Belgium        | 1.8                         | 1.4-11.5     | 0.3%       | 0.0%-29.1%    | nc        | nc-nc        | 1.2         | 0-144.4         |
| Bulgaria       | 1.8                         | 1.5-2.4      | 1.5%       | 0.2%-16.1%    | nc        | nc-nc        | 1.0         | 0.1-10.6        |
| Croatia        | 1.8                         | 1.5-2.2      | 0.4%       | 0.2%-1.6%     | nc        | nc-nc        | 0.6         | 0.3-6.2         |
| Cyprus         | 0.0                         | 0-0          | 0.0%       | 0.0%-0.0%     | nc        | nc-nc        | 0.0         | 0-0             |
| Czechia        | 1.9                         | 1.5-2.4      | 1.7%       | 0.3%-49.9%    | nc        | nc-nc        | 9.1         | 0.9-249.8       |
| Denmark        | 1.4                         | 0-1.8        | 1.6%       | 0.0%-49.9%    | nc        | nc-nc        | 0.4         | 0-12.2          |
| Estonia        | 2.7                         | 1.7-5.7      | 0.6%       | 0.2%-3.1%     | nc        | nc-nc        | 0.2         | 0-1.9           |
| Finland        | 2.4                         | 1.7-3.7      | 2.0%       | 0.9%-33.4%    | nc        | nc-nc        | 5.3         | 1-58.3          |
| France         | 1.7                         | 1.5-2        | 0.5%       | 0.2%-7.2%     | nc        | nc-nc        | 11.7        | 2.6-194.3       |
| Germany        | 2.0                         | 1.7-2.8      | 0.3%       | 0.1%-4.5%     | nc        | nc-nc        | 4.7         | 0.6-78.6        |
| Greece         | 3.0                         | 2.1-4.5      | 0.4%       | 0.2%-1.0%     | nc        | nc-nc        | 0.0         | 0-0.5           |
| Hungary        | 1.6                         | 1.3-2.6      | 0.3%       | 0.0%-2.8%     | nc        | nc-nc        | 1.6         | 0-34            |
| Ireland        | 1.7                         | 1.5-2.2      | 2.3%       | 1.0%-73.1%    | nc        | nc-nc        | 3.2         | 1-64.9          |
| Italy          | 1.9                         | 1.7-2.1      | 1.2%       | 0.4%-23.6%    | nc        | nc-nc        | 16.2        | 2.8-268.6       |
| Latvia         | 2.1                         | 1.6-2.6      | 0.7%       | 0.2%-3.1%     | nc        | nc-nc        | 0.9         | 0.1-7.1         |
| Lithuania      | 2.1                         | 1.6-10.5     | 0.9%       | 0.1%-2.0%     | nc        | nc-nc        | 0.5         | 0-2             |
| Luxembourg     | 1.2                         | 0-1.7        | 0.0%       | 0.0%-3.1%     | nc        | nc-nc        | 0.0         | 0-1.8           |
| Netherlands    | 0.0                         | 0-0          | 0.0%       | 0.0%-0.0%     | nc        | nc-nc        | 0.0         | 0-0             |
| Poland         | 2.1                         | 1.6-3.9      | 0.3%       | 0.1%-1.3%     | nc        | nc-nc        | 2.2         | 0.1-12.2        |
| Portugal       | 4.6                         | 2.8-6.3      | 0.4%       | 0.3%-0.7%     | nc        | nc-nc        | 0.0         | 0-0.1           |
| Romania        | 2.8                         | 2.3-3.4      | 1.3%       | 0.7%-28.3%    | nc        | nc-nc        | 2.9         | 1-110.1         |
| Slovakia       | 1.8                         | 1.4-3.6      | 0.0%       | 0.0%-0.2%     | nc        | nc-nc        | 0.0         | 0-0.4           |
| Slovenia       | 2.4                         | 1.7-3.8      | 0.4%       | 0.2%-1.4%     | nc        | nc-nc        | 0.1         | 0-1.3           |
| Spain          | 3.1                         | 2.7-3.7      | 1.3%       | 0.9%-17.2%    | nc        | nc-nc        | 2.5         | 1-30.1          |
| Sweden         | 3.5                         | 2.2-6        | 68%        | 2.5%-76.9%    | nc        | nc-nc        | 170.3       | 8.2-239.4       |
| United Kingdom | 2.1                         | 1.7-2.6      | 38%        | 6.8%-67.4%    | nc        | nc-nc        | 393.8       | 55.3-838.6      |
| <b>EU+UK</b>   | <b>2.4</b>                  | <b>2-2.8</b> | <b>16%</b> | <b>6%-30%</b> | <b>nc</b> | <b>nc-nc</b> | <b>1110</b> | <b>358-2946</b> |

*Table S17. Overview of key adaptation results based on relocation at country level for the 3°C warming scenario in 2100. The Benefit-Cost Ratio (BCR) is calculated as ratio of discounted benefits and costs over the period 2020-2100. Reduction (in %) in expected annual damage (EAD) and population exposed (EAPE) are calculated as difference in undiscounted damage and population exposed in 2100 with and without adaptation. Cost of implementation (in €million/year) reflect average of undiscounted costs over the period 2020-2100. All variables include the ensemble median and interquartile range the first/third quartile.*

| Country        | Relocation |                |             |              |             |                  |             |             |
|----------------|------------|----------------|-------------|--------------|-------------|------------------|-------------|-------------|
|                | BCR        |                | EAD red.    |              | EAPE red.   |                  | Costs €M/y  |             |
|                | med        | Q1-Q3          | med         | Q1-Q3        | med         | Q1-Q3            | med         | Q1-Q3       |
| Austria        | 0.0        | 0-0            | 0.0%        | 0.0%-0.0%    | 0.0%        | 0.0%-0.0%        | 0.0         | 0-0         |
| Belgium        | 0.0        | 0-19.3         | 0.0%        | 0.0%-0.0%    | 0.0%        | 0.0%-0.0%        | 0.0         | 0-0         |
| Bulgaria       | 1.3        | 0-1.9          | 0.0%        | 0.0%-0.1%    | 0.0%        | 0.0%-0.0%        | 0.0         | 0-0.1       |
| Croatia        | 0.0        | 0-1.3          | 0.0%        | 0.0%-0.0%    | 0.0%        | 0.0%-0.0%        | 0.0         | 0-0.1       |
| Cyprus         | 0.0        | 0-0            | 0.0%        | 0.0%-0.0%    | 0.0%        | 0.0%-0.0%        | 0.0         | 0-0         |
| Czechia        | 2.8        | 2-3.7          | 0.1%        | 0.0%-0.1%    | 0.1%        | 0.0%-0.1%        | 0.1         | 0-0.2       |
| Denmark        | 0.0        | 0-0            | 0.0%        | 0.0%-0.0%    | 0.1%        | 0.0%-0.1%        | 0.0         | 0-0         |
| Estonia        | 144.4      | 48.1-350       | 0.1%        | 0.0%-0.2%    | 0.1%        | 0.0%-0.1%        | 0.0         | 0-0         |
| Finland        | 5.3        | 1.8-14.8       | 0.0%        | 0.0%-0.7%    | 0.1%        | 0.1%-0.4%        | 0.0         | 0-1.8       |
| France         | 4.3        | 2.7-6.7        | 0.0%        | 0.0%-0.1%    | 0.0%        | 0.0%-0.0%        | 0.1         | 0-0.4       |
| Germany        | 4.3        | 3-6            | 0.0%        | 0.0%-0.1%    | 0.0%        | 0.0%-0.1%        | 0.3         | 0-0.5       |
| Greece         | 2.1        | 1.6-3          | 0.2%        | 0.0%-0.3%    | 0.0%        | 0.0%-0.0%        | 0.0         | 0-0.1       |
| Hungary        | 0.0        | 0-10.4         | 0.0%        | 0.0%-0.0%    | 0.0%        | 0.0%-0.0%        | 0.0         | 0-0         |
| Ireland        | 2.8        | 1.8-28.3       | 0.0%        | 0.0%-0.1%    | 0.1%        | 0.0%-0.1%        | 0.0         | 0-0.1       |
| Italy          | 1.7        | 1.2-7.1        | 0.0%        | 0.0%-0.1%    | 0.0%        | 0.0%-0.1%        | 0.1         | 0-1.5       |
| Latvia         | 3.4        | 2.1-6.1        | 0.0%        | 0.0%-0.1%    | 0.0%        | 0.0%-0.1%        | 0.0         | 0-0.1       |
| Lithuania      | 7.3        | 2.1-70.2       | 0.1%        | 0.1%-0.1%    | 0.1%        | 0.1%-0.1%        | 0.0         | 0-0         |
| Luxembourg     | 0.0        | 0-0            | 0.0%        | 0.0%-0.0%    | 0.0%        | 0.0%-0.0%        | 0.0         | 0-0         |
| Netherlands    | 0.0        | 0-0            | 0.0%        | 0.0%-0.0%    | 0.0%        | 0.0%-0.0%        | 0.0         | 0-0         |
| Poland         | 5.7        | 4.3-7.9        | 0.1%        | 0.0%-0.1%    | 0.1%        | 0.0%-0.1%        | 0.1         | 0-0.1       |
| Portugal       | 5.4        | 3.4-7.7        | 0.2%        | 0.2%-0.3%    | 0.3%        | 0.2%-0.3%        | 0.0         | 0-0         |
| Romania        | 2.1        | 1.5-2.7        | 0.6%        | 0.0%-0.8%    | 0.1%        | 0.0%-0.1%        | 1.3         | 0-2         |
| Slovakia       | 0.0        | 0-1.9          | 0.0%        | 0.0%-0.0%    | 0.0%        | 0.0%-0.0%        | 0.0         | 0-0         |
| Slovenia       | 1.8        | 0-3.3          | 0.1%        | 0.1%-0.2%    | 0.1%        | 0.0%-0.1%        | 0.0         | 0-0.1       |
| Spain          | 3.3        | 2.6-4.2        | 0.5%        | 0.3%-0.7%    | 0.1%        | 0.0%-0.9%        | 0.6         | 0.1-1.2     |
| Sweden         | 2.4        | 1.8-3.5        | 0.3%        | 0.1%-3.1%    | 0.2%        | 0.1%-2.8%        | 0.6         | 0.1-19.6    |
| United Kingdom | 2.2        | 1.8-2.5        | 0.2%        | 0.1%-0.3%    | 0.1%        | 0.1%-0.3%        | 1.0         | 0.5-2.6     |
| <b>EU+UK</b>   | <b>2.3</b> | <b>1.9-2.8</b> | <b>0.2%</b> | <b>0%-1%</b> | <b>0.1%</b> | <b>0.1%-0.2%</b> | <b>11.0</b> | <b>4-39</b> |

### **S3. Database of flood protection levels**

Reliable information on flood protection levels is crucial for a correct estimation of river flood risk. In Europe, detailed descriptions of protection structures (i.e. type, location, geometry, design parameters) are usually available only for limited areas, while information on the design level of protection can be found for a few countries and urban areas [26,27]. Recent studies tried to overcome these limitations by developing empirical functions for estimating protection levels where information is not available. Jongman et al. [28] estimated protection levels in Europe according to modelled flood risk, assigning higher protection in areas with higher risk. The FLOPROS database [26] combined reported protection levels (based on technical reports and policy recommendations) with modelled values, interpolated at local administrative level according to gross domestic product. In several countries in Europe, these two datasets propose substantially different protection levels, especially in Northern and Eastern Europe.

The reliability of estimating protection levels through proxy variables has been questioned. A recent study carried out in United States [29] did not find any clear link between protection standards and variables such as degree of urbanization, gross domestic product, population density and land use. On the other hand, major European river watersheds such as the Rhine and the Danube maintain higher levels of protection in densely populated areas than in rural areas [28].

For the present study, we developed a new dataset of flood defence standards. The dataset leverages different sources of information on protection levels, using modelled and observed flood losses to select the most plausible protection levels for each country in geographical Europe (excluding Russia, Belarus, Ukraine, and countries in the Caucasus). The map in Figure S1 shows the distribution of protection levels across Europe.

The following set of rules dictate the hierarchal flood protection standards used in the dataset:

- Highest priority is given to design protection levels, where available from either official reports or scientific publications. To this end, we used the information collected by the FLOPROS database [26], integrated with further literature review [27]. Where literature information is unavailable, the level of flood defence is determined at country scale through an inverse modelling approach, identifying the protection values that provide the closest match between modelled and available reported losses. We use the flood risk modelling framework described in this work to calculate multiple flood loss scenarios, using the two datasets of protection



standards currently available for all Europe [26,28] and a range of uniform protection values at country scale.

- In countries where national-scale flood loss assessments are available (either from technical reports, scientific publications, or loss datasets such as EM-DAT [30], the NatCatService [31] and HANZE [32]), we selected from the multiple flood loss scenarios the protection values that provide the closest match with national-scale flood losses;
- In countries where all modelled flood loss scenarios exceed 200% of reference loss data (see Section S4 and Figure S2), we used a uniform national value between 50 and 150 years. This range reflects the standards reported in literature [26,27]. Design and/or legally defined protection levels are often set to at least 100-year return period at country scale (e.g. Austria, Hungary, Netherlands) and in areas around large rivers (e.g. Sava and Danube in Croatia and Serbia; Po in Italy). Higher protection standards are reported for the Netherlands and in some major urban areas (e.g. Budapest, Hamburg, London, Vienna), and protection values below 50-year return period are seldom reported. As such, we did not use protection levels higher than 150 years to avoid unrealistic values in countries where modelled losses are far from reports (e.g. Scandinavian countries), or where few reported data are available (e.g. Estonia, Latvia and Lithuania) .

Note that the selection of protection levels is carried out at the country scale because flood losses from observations are mostly reported at national level.

#### **S4. Reliability and uncertainty of the modelling components**

Modelling present and future river flood impacts at continental scale requires inevitable simplifications, which limit the accuracy of results. Furthermore, there is substantial uncertainty pertaining to models and datasets representing hazard, exposure and vulnerability, especially when used for projecting future scenarios [33]. Alfieri et al. [34] applied a modelling framework comparable to the present work to model the impacts of major flood events that occurred in Europe since 1990, and found that recorded impacts could be adequately reproduced. However, they did not investigate in detail the skill of the single modelling components. In this Section we discuss the main sources of uncertainty of the modelling framework, we review previous

validation exercises of the modelling components, and we present additional validation analyses regarding economic losses.

*Figure S1. Distribution of flood protection levels across Europe, expressed as maximum return period of the design flood (in years). Countries not included in the analysis are depicted in grey.*

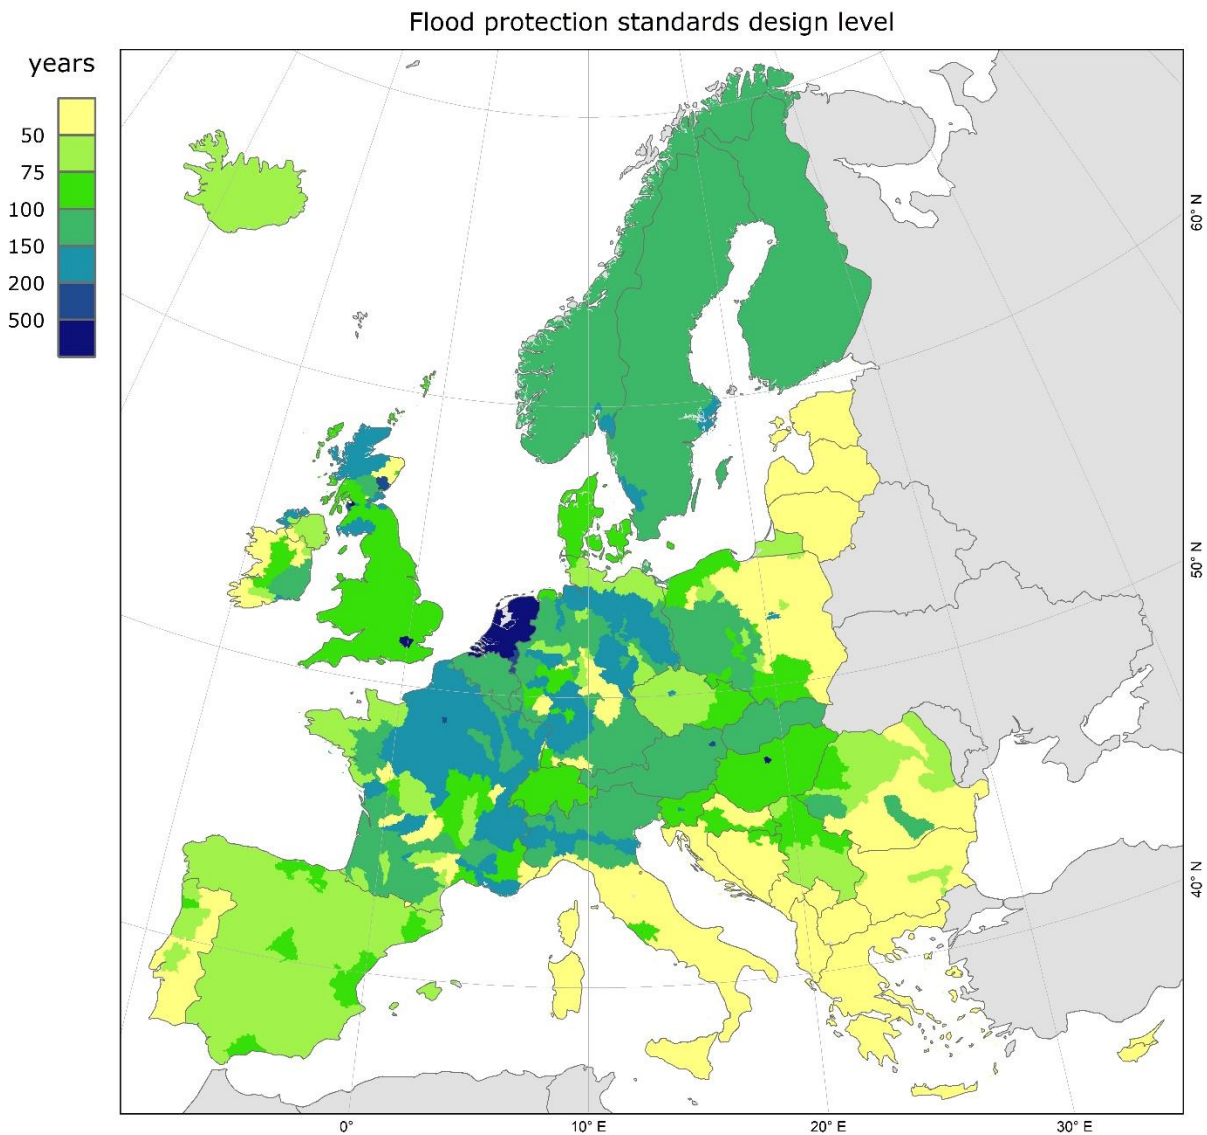

### *Flood hazard maps*

The river flood hazard maps have been evaluated using official hazard maps for Hungary, Italy, Norway, Spain and the United Kingdom [18]. Modelled maps could identify on average two-thirds of reference flood extent, however they also overestimated flood-prone areas for flood

probabilities below 1-in-100-year, while for return periods equal or above 500 years the maps could correctly identify more than half of flooded areas. Overall results were comparable to existing large-scale flood models when using similar parameters and conditions for the validation. Dottori et al. [18] identified different shortcomings of the modelling framework, such as the absence of flood protections and limited topographic detail for river channels and low land areas.

#### *Climate and hydrological projections*

The use of an ensemble with 22 climate projections aims at characterizing the overall climate uncertainty in the hydrological simulations [35]. However, the ensemble might still underrepresent the real uncertainty of future climate scenarios [36]. Other factors such as the bias correction of climate projections and the spatial resolution of the input data may influence results though probably to a smaller degree [16]. In this work we used a single hydrological model for all future projections, namely the LISFLOOD model. Using an ensemble of hydrological models might better represent the uncertainty of future hydrological changes, since previous research [17,18] showed that future streamflow and inundation projections are significantly affected by the choice of hydrological and flooding components.

The skill of the LISFLOOD model in reproducing observed flow regimes has been extensively tested by [37] and is summarized in [18]. These authors observed that the difference between empirical and modelled distributions of annual discharge maxima is generally below 25% for the gauge stations used for calibration and validation. A lower model skill was observed in areas characterized by the presence of several reservoirs, dams and other flow control structures. Reservoir parameters are calibrated in LISFLOOD to improve reproduction of observed outflows. Yet, in Europe only a minority of dams (less than 10%) are exclusively or partially designed for flood control [38] and therefore the operating rules might significantly diverge from those simulated.

#### *Exposure and vulnerability data*

The accuracy of exposure data have been tested in previous studies [39,40,41], however the 100m resolution used might be insufficient to characterize population and asset exposure in some areas [42].

Methods for evaluating economic losses due to floods are a key source of uncertainty in evaluating flood impacts [43]. Huizinga et al. [21] observed that the potential uncertainty of flood damage functions can exceed  $\pm 50\%$ , although this value is in line with the typical accuracy of damage models [43]. This is further exemplified by previous applications of damage functions that showed mixed performances when compared with observed damages [44,45].

### *Flood protection standards*

Flood protection standards are possibly the most relevant source of uncertainty in large-scale modelling exercises [46]. In the present study we have developed a database combining reported and modelled protection levels from different sources (see Section S3). However, the overall confidence about flood protection estimates is highly variable across Europe, and in particular it is lower in Eastern Europe countries due to the lack of information.

In Figure S2 we provide a further evaluation of country-scale results by comparing modelled annual average economic losses against reported losses. Uncertainty ranges of reported losses in Figure S2 are given by the minimum and maximum reported value for each country (available in Table S18), while for modelled losses we report the minimum and maximum values of the sensitivity analysis described in Section S1.

We find that in several countries modelled loss estimates are comparable with reported losses, taking into account the uncertainty bounds of both (i.e. the median values of modelled losses fall within the uncertainty bounds of reported losses). In total, these countries account for more than 60% and 85% of, respectively, overall modelled and reported losses. Notably, modelled losses match observations in most countries where national-scale protection values are based on reported data (Austria, Netherlands, United Kingdom, with the exception of Hungary). This fact suggests that the risk modelling framework is able to reproduce actual flood losses, within the limits of continental-scale datasets. Our estimates are also in line with available country-scale risk assessments based on independent models and data. For instance, [62] estimated for Germany a median EAD of 530 million €, with an uncertainty range of 245-940 million €.

*Table S18. Comparison of modelled flood losses (median value) against reported data from national reports (see references in each row) and loss datasets (HANZE [32]; EM-DAT [30], the NatCatService [31]). All losses are expressed in million € (actualized to 2015 value).*

| Country            | Loss datasets (1990-2015 )<br>[M€] |                |        | National loss reports<br>[M€] | Modelled losses – median<br>[M€] | References for national loss reports and notes |
|--------------------|------------------------------------|----------------|--------|-------------------------------|----------------------------------|------------------------------------------------|
|                    | HANZE - river                      | NatCat Service | EM-DAT |                               |                                  |                                                |
| Albania            |                                    | 5.3            | 1.2    |                               | 21                               |                                                |
| Austria            | 220.4                              | 232.0          | 193.1  |                               | 260                              |                                                |
| Belgium            | 11.7                               | 13.0           | 8.2    |                               | 209                              |                                                |
| Bosnia-Herzegovina |                                    | 48.9           | 14.5   |                               | 109                              |                                                |
| Bulgaria           | 21.3                               | 51.0           | 31.2   |                               | 87                               |                                                |
| Croatia            | 19.4                               | 57.3           | 2.4    |                               | 188                              |                                                |
| Cyprus             |                                    | 0.2            | 0.0    |                               | 4                                |                                                |
| Czech Republic     | 324.0                              | 332.8          | 321.8  | 433-546                       | 412                              | [47,48]                                        |
| Denmark            | 0.0                                | 2.5            | 0.0    |                               | 15                               |                                                |
| Estonia            | 0.0                                | 0.0            | 0.0    |                               | 58                               |                                                |
| Finland            | 0.6                                | 0.9            | 0.0    | 2.5                           | 272                              | [49]                                           |
| France             | 262.1                              | 270.3          | 265.3  | 664-800                       | 1288                             | [50,51,52] (all types of floods)               |
| Germany            | 859.9                              | 1011.1         | 1001.4 |                               | 922                              |                                                |
| Greece             | 1.8                                | 29.5           | 59.0   |                               | 81                               |                                                |
| Hungary            | 59.7                               | 47.1           | 39.5   |                               | 274                              |                                                |
| Ireland            | 12.4                               | 49.0           | 11.6   | 97                            | 62                               | [53]                                           |
| Italy              | 484.7                              | 1250.7         | 1075.8 |                               | 887                              |                                                |
| Latvia             | 0.0                                | 0.0            | 0.0    |                               | 227                              |                                                |
| Lithuania          | 0.1                                | 0.0            | 0.0    |                               | 112                              |                                                |
| Luxembourg         | 1.0                                | 0.9            | 0.5    |                               | 20                               |                                                |
| Montenegro         |                                    | 0.5            | 0.0    |                               | 16                               |                                                |
| Netherlands        | 11.9                               | 76.9           | 28.9   |                               | 79                               |                                                |
| North Macedonia    | 0.0                                | 12.3           | 11.1   |                               | 31                               |                                                |
| Norway             | 26.6                               | 14.3           | 11.2   | 34                            | 133                              | [54]                                           |
| Poland             | 325.2                              | 342.4          | 340.9  | 359                           | 581                              | [55]                                           |
| Portugal           | 0.6                                | 0.2            | 0.8    |                               | 57                               |                                                |
| Romania            | 123.4                              | 156.7          | 132.4  | 894                           | 340                              | [56]                                           |
| Serbia             |                                    | 69.5           | 101.0  |                               | 202                              |                                                |
| Slovakia           | 17.5                               | 34.6           | 16.9   | 81                            | 142                              | [57]                                           |
| Slovenia           | 59.1                               | 13.3           | 8.0    | 86                            | 59                               | [58]                                           |
| Spain              | 28.7                               | 70.0           | 60.2   | 1059                          | 452                              | [59] (all types of floods)                     |
| Sweden             | 3.4                                | 1.8            | 0.0    |                               | 244                              |                                                |
| Switzerland        |                                    | 207.1          | 132.8  | 265                           | 279                              | [60] (floods - debris flows)                   |
| United Kingdom     | 375.6                              | 622.5          | 870.3  | 2028                          | 676                              | [61] (coastal - river floods)                  |

Figure S2. Comparison of modelled and reported average annual losses at country level. Bars indicate minimum-maximum range and median value. Sample size of modelled losses: 9; Sample size of observed losses: 2-5 (see Table S18 for the values for each country).

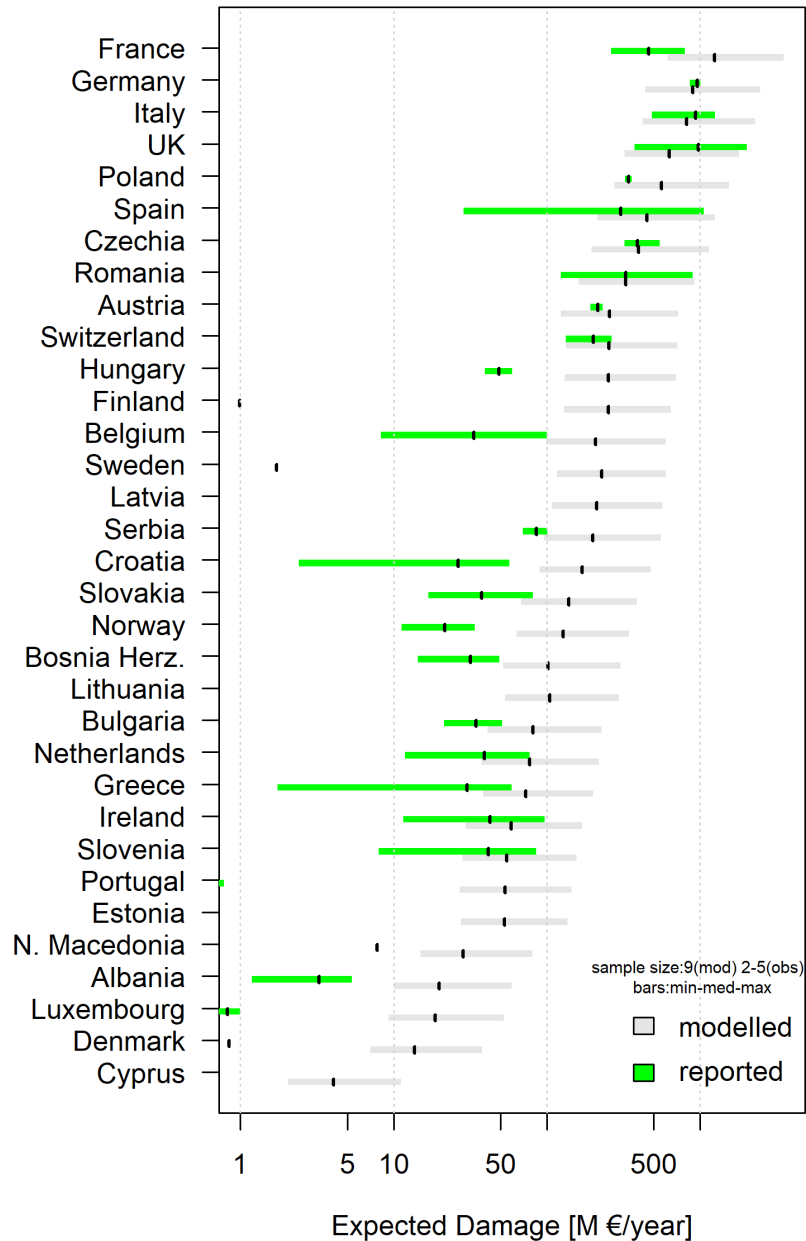

Conversely, losses appear largely overestimated (i.e. more than 100%) in France, in Scandinavian countries (Denmark, Sweden and Finland), as well as in several medium-small countries (e.g. Belgium, Bulgaria, Croatia, Latvia, Lithuania). While the mentioned limitations of the modelling framework can explain the gap between modelled and reported data in these countries, it is

important to note the differences between loss data from different sources. On the one hand, national-scale studies in Table S18 report larger losses than European and global scale datasets. A comparison of national disaster loss databases with global loss data showed that total losses can be up to 60% higher, due to the fact that extensive losses from high-frequency, low-severity events are not accounted for [63]. This suggests a lower confidence of risk estimates where no national loss data are available. On the other hand, some national loss reports include impacts due to flash floods, coastal floods or dike failure events, which are not considered in our modelling framework. Where possible, we considered only reported losses attributed to river flooding. In Southern and Central European countries such as France, Greece, Italy and Spain, the contribution of flash floods to overall flood impacts is considerable and might equal the share due to river floods [32].

Accurate modelling of historical loss data is further complicated by the temporal and spatial variability of risk components over the period of observations [32], whereas modelled losses assume fixed exposure and vulnerability. In addition, reported losses refer to specific time periods, so the estimated average annual loss is influenced by the frequency of events that can vary significantly depending on the period. Finally, our modelling framework does not consider the possibility of failure of protection measures.

### *Modelling of adaptation measures*

The outcomes of the adaptation analysis are sensitive to the modelling assumptions used in the design of adaptation measures, and to the parameters used to determine costs and benefits of the different measures, which vary widely among studies (Table S2). For instance, descriptions of flood proofing measures report variable costs according to the type of measure (e.g. wet or dry proofing, elevation), the attainable damage reduction and the level of hazard (e.g. protection up to 1m of water depth). More accurate analysis could be carried out considering separately different flood proofing measures in view of local hazard and exposure characteristics. Yet, the limited number of empirical studies available from literature and the accuracy of continental-scale data still restrict such analyses to local scales [14,64].

We base the design of detention areas on considering only available floodplain storage and flood volumes. However, other factors influence the hydraulic behaviour of a detention area, such as

the shape and magnitude of the flood hydrographs, and the tributary conditions both upstream and downstream of the detention area. Therefore, the design of detention areas would require simulating multiple scenarios with variable spatial and temporal distribution of flood waves [65,66,67]. Also, some floodplains might already be used as detention areas, as it is the case for the Sava River Basin [68] and the Netherlands [65], or might be a protected natural area (e.g. Natura 2000 network, [https://ec.europa.eu/environment/nature/natura2000/index\\_en.htm](https://ec.europa.eu/environment/nature/natura2000/index_en.htm)). Additional factors such as the ratio between overall storage volume and storage area influence the effectiveness of retention and detention areas.

Different studies report higher costs of raising dykes in urbanized areas than in rural areas, as available spaces are reduced [4]. Moreover, the simplified approach used to design dike heightening and detention areas cannot fully reproduce their interaction with existing flood control structures. For instance, heightening dikes upstream might increase the magnitude of flood waves downstream, thus reducing the effectiveness of flood protections and altering the functioning of structures such as in-line reservoirs. On the other hand, it is important to note that changes of stream flow regime under future climate will modify as well the operating rules and conditions of existing structures. For relocation, implementation costs are largely dependent on building parameters (e.g. number of dwellings and storeys, market value of acquired land and relocated buildings) which are not available at EU scale.

Even though we cannot explicitly validate the risk reduction rates calculated for the adaptation measures, the findings of recent research works are broadly consistent with the results of our analysis. Farrag et al. [69] evaluated the role of floodplain storage in attenuating flood peaks along the German part of the Rhine River. The authors considered a 10,000-year synthetic flood time series under present-day climate conditions, and used a detailed 1D-2D hydrodynamic modelling framework to simulate the effect of uncontrolled floodplain storage consequent to levee overtopping. The modelling framework of [69] differs in some aspects with our analysis of risk reduction based on floodplain detention areas. Still, they found an overall risk reduction by over 50% over the simulation period, which is well comparable with the median EAD reduction of 66% (50%-81%) found in our study for the whole Germany under the 1.5°C warming scenario. Previous studies confirmed that cost-efficiency of building-based damage mitigation measures depends strongly on the flood probability faced by households. Richert et al [14] recommended dry-proofing measures and elevating buildings only for dwellings that are exposed to floods with



a return period lower than, respectively 100 years and 30 years. Similarly, [64] reported that some flood damage mitigation measures are cost-effective in areas with flood frequencies up to 1-in-50-year. Such indications are consistent with the outcome of our analysis, that is, flood-proofing of buildings becomes more economically attractive as climate change increases flood frequencies [64].

### *Cost-benefit analysis*

The cost-benefit analysis (CBA) applied here is based on several assumptions that have to be considered to better understand the outcomes.

We based the analysis on optimizing each adaptation measure separately at NUTS2 region level (DS and RA measures) or over a 5km grid (FP and RE measures). On the one hand, using uniform design levels may be not ideal since exposure can be highly variable within each NUTS2 and 5km region and therefore protection measures may be needed only in certain parts of a region, such as in urban and densely populated areas. This is especially true for measures based on exposure and vulnerability reduction (i.e. relocation and damage reduction measures), for which cost/benefit analysis can be applied even at building scale. For instance, a recent analysis carried out in United States found an average benefit-cost ratio of 6.5 for targeted relocation of residential houses [69], whereas we considered for relocation all built-up areas located within the 1-in-500-year flood extent.

On the other hand, the resolution of data and models applied in this study is strongly limited by the continental scale of the analysis. For instance, additional tests considering relocation only for built-up areas located within the 1-in-50-year flood extent did not show significant changes at European and country scale in terms of cost-benefit analysis.

Moreover, having different protections standards for nearby regions may pose problems in the implementation of measures based on hazard reduction (i.e. dykes strengthening and detention areas), which require more uniform levels of protection along the river network.

We evaluate benefits as the reduction in expected annual economic damages, meaning that low-probability/high-consequence events and high-probability/low-consequence events have the same weight if the expected impact is the same. This risk-neutral approach disregards any possible

risk aversion of societies, that is, the willingness to avoid high-consequence events, for instance by paying risk insurance premiums [71].

Furthermore, we assume a constant value of money across society, whereas damage has a larger impact on welfare of lower-income population [71]. Using property damage as a metric for evaluating adaptation benefits systematically favours interventions in wealthier, densely populated areas over rural and less developed areas, because avoided damages are greater [72]. We also do not consider differences in social vulnerability, which greatly influences the capacity of households to adapt and respond to floods [73]. Indeed, different studies observed an uneven distribution of water related risks shaped by socio-political structures in the Netherlands [73], South Africa [74] and the United States [75].

These assumptions (risk neutrality, constant value of money and constant vulnerability across society) can be considered acceptable assuming that both costs and benefits are typically largely covered by national governments, for instance through compensation of flood losses and investments in flood protections [71]. This is consistent with the current risk management policies of different European countries, although each country uses different criteria regarding insured losses, liability for damages and refunding policies [76]. It is important to note that CBA methods can be modified to account for risk aversion and social vulnerability, so further research could focus on these issues [77].

Our CBA analysis only provides a qualitative assessment of the environmental costs and benefits of adaptation measures, and impacts on cultural heritage and critical infrastructures and buildings are not considered. Also, socio-economic projections are independent from flood risk projections, therefore we cannot simulate maladaptation effects such as increased development in floodplains caused by increased protection. Moreover, the reduction in population exposed is not monetized in the cost/benefit analysis, due to the lack of accurate information on impacts (both physical and social) and sensitivity issues in attributing economic value to human lives [78]. It is important to note that in some countries the protection of people is prioritized over economic convenience. For instance, Austria and Germany ensure the same flood protection design everywhere according to [76]. The use of methods such as multi-criteria analyses and robust decision-supporting approaches [78] may allow for the inclusion of non-monetary impacts in risk assessment.

The outcomes of the CBA analysis are also sensitive to discounting, which gives more weight to present capital costs and downgrades the benefits that will mostly come later in the century. We

used discount rates in line with the EC Guide to Cost-Benefit Analysis of Investment Projects [79] that were assumed constant in time. We did not analyse the effect of higher discount values because adaptation measures must necessarily be designed for long-term effects, and thus are penalized. Using lower or time-declining social discount rates results in higher cost-effectiveness of all the measures and supports the view that we should act now to protect future generations. As such, in the article we compare impacts under present and future scenarios using undiscounted economic values, in order to highlight the impact reduction provided by the different adaptation strategies [79]. Similarly, adaptation measures are optimised considering the most likely river flow projections in 2100 under the 1.5°C, 2°C and 3°C warming scenarios. Decision makers could select a more conservative criterion and aim to protect against the high-end, less probable future extreme river flows. This would require higher investments but imply less risks for future generations.

## S5. SI references

- 1) Jacob, D., et al. EURO-CORDEX: new high-resolution climate change projections for European impact research. *Reg. Environ. Change* 14(2), 563-578 (2014).
- 2) Kuik, O., et al. Assessing the economic case for adaptation to extreme events at different scales. Report of the ECONADAPT project, [https://econadapt.eu/sites/default/files/docs/Deliverable%205-1%20approved%20for%20publishing\\_1.pdf](https://econadapt.eu/sites/default/files/docs/Deliverable%205-1%20approved%20for%20publishing_1.pdf) (accessed on 3/5/2022) (2016).
- 3) European Environmental Agency. Green Infrastructure and Flood Management. EEA Report No 14/2017. <https://www.eea.europa.eu/publications/green-infrastructure-and-flood-management> (accessed on 3/5/2022) (2017)
- 4) Aerts, J.C.J.H. A Review of Cost Estimates for Flood Adaptation. *Water*, 10(11), 1646 (2018).
- 5) GFDRR, World Bank Group, Profor, WRI. Nature-based solutions for disaster risk management, <https://reliefweb.int/sites/reliefweb.int/files/resources/134847-NBS-for-DRM-booklet.pdf> (accessed on 20/9/2019) (2019).
- 6) Pappenberger F., et al. The monetary benefit of early flood warnings in Europe. *Environmental Science & Policy* 51, 278-291 (2015).
- 7) Meyer, V., Priest, S., Kuhlicke, C. Economic evaluation of structural and non-structural flood risk management measures: examples from the Mulde River. *Nat. Hazards* 62, 301–324 (2012).
- 8) Best, J. Anthropogenic stresses on the world’s big rivers. *Nature Geoscience* 12, 7–21 (2019).
- 9) Barbarossa, V., et al. Impacts of current and future large dams on the geographic range connectivity of freshwater fish worldwide. *Proc. Natl. Acad. Sci. USA*, 117(7), 3648-3655 (2020).
- 10) Wohl, E. An integrative conceptualization of floodplain storage. *Reviews of Geophysics*, 59, e2020RG000724 (2021).
- 11) Gersonius, B., Zevenbergen, C., Puyan, N., Billah, M.M.M. Efficiency of private flood proofing of new buildings—adapted redevelopment of a floodplain in the Netherlands.

- WIT Transactions on Ecology and the Environment*, Vol 118: Flood Recovery, Innovation and Response, doi:10.2495/FRIAR080241 (2008).
- 12) Kreibich, H., Bubeck, P., Van Vliet, M., De Moel, H. A review of damage-reducing measures to manage fluvial flood risks in a changing climate. *Mitigation and Adaptation Strategies for Global Change*, 20(6), 967-989 (2015).
  - 13) Du, S. et al., Hard or soft flood adaptation? Advantages of a hybrid strategy for Shanghai. *Glob. Environ. Change* 61, 102037 (2020).
  - 14) Richert, C., Boisgontier, H. & Grelot, F. Economic assessment of precautionary measures against floods: insights from a non-contextual approach, *Nat. Hazards Earth Syst. Sci.*, 19, 2525–2539 (2019).
  - 15) Ward, P. J., et al. A global framework for future costs and benefits of river-flood protection in urban areas. *Nat. Clim. Change*, 7(9), 642-646 (2017).
  - 16) Alfieri, L., Dottori, F., Betts, R., Salamon, P., Feyen, L. Multi-model projections of river flood risk in Europe under global warming. *Climate* 6, 6 (2018).
  - 17) Dankers, R., et al. First look at changes in flood hazard in the Inter-Sectoral Impact Model Intercomparison Project ensemble. *Proc. Natl. Acad. Sci. USA* 111(9), 3257-3261 (2014).
  - 18) Dottori, F., Alfieri, L., Bianchi, A., Skoien, J., and Salamon, P. A new dataset of river flood hazard maps for Europe and the Mediterranean Basin, *Earth Syst. Sci. Data*, 14, 1549–1569 (2022).
  - 19) Thielen, A. et al. The flood of June 2013 in Germany: how much do we know about its impacts? *Nat. Hazards Earth Syst. Sci.* 16(6), 1519–1540 (2016).
  - 20) Wagenaar, D. J., de Bruijn, K. M., Bouwer, L. M., & de Moel, H. Uncertainty in flood damage estimates and its potential effect on investment decisions, *Nat. Hazards Earth Syst. Sci.*, 16, 1-14 (2016).
  - 21) Huizinga, J., Moel, H. de, Szewczyk, W. Global flood depth-damage functions. Methodology and the database with guidelines. *Publications Office of the European Union*, Luxembourg, EUR 28552 EN. doi:10.2760/16510 (2017).
  - 22) Wing, O.E.J., et al. Inequitable patterns of US flood risk in the Anthropocene. *Nat. Clim. Change* 12, 156–162 (2022).

- 23) European Commission. The 2015 Ageing Report; Economic and budgetary projections for the 28 EU Member States (2013-2060), *Publications Office of the European Union*, Luxembourg (2015).
- 24) Jacobs-Crisioni, C., et al. The LUISA Territorial Reference Scenario 2017. A technical description, *Publications Office of the European Union*, Luxembourg, ISBN 978-92-79-73866-1. (2017).
- 25) Dottori, F., Mentaschi, L., Bianchi, A., Alfieri, L., & Feyen, L., Adapting to rising river flood risk in the EU under climate change, *Publications Office of the European Union*, Luxembourg, EUR 29955 EN, JRC118425 (2020).
- 26) Scussolini, P., et al. FLOPROS: an evolving global database of flood protection standards. *Nat. Hazards Earth Syst. Sci.*, 16(5), 1049-1061 (2016).
- 27) Dottori, F., et al. An operational procedure for rapid flood risk assessment in Europe, *Nat. Hazards Earth Syst. Sci.* 17, 1111–1126 (2017).
- 28) Jongman, B., et al. Increasing stress on disaster-risk finance due to large floods. *Nat. Clim. Change* 4, 264–268 (2014).
- 29) Wing, O. E. J., et al. A New Automated Method for Improved Flood Defense Representation in Large-Scale Hydraulic Models. *Water Resources Research* 55, 11007-11034 (2019).
- 30) EM-DAT (CRED), accessed on 30/5/2019, <http://www.emdat.be>.
- 31) MUNICH-RE. NatCatService loss dataset (accessed on 1/12/2018).
- 32) Paprotny, D., Sebastian, A., Morales-Napoles, O., Jonkman, S. Trends in flood losses in Europe over the past 150 years. *Nat. Communications* 9(1), 1985 (2018).
- 33) Dottori, F. et al. Increased human and economic losses from river flooding with anthropogenic warming. *Nat. Clim. Change* 8, 781–786 (2018).
- 34) Alfieri, L. et. al. Modelling the socio-economic impact of river floods in Europe, *Nat. Hazards Earth Syst. Sci.* 16, 1401–1411 (2016).
- 35) Mentaschi, L., et al. Independence of future changes of river runoff in Europe from the pathway to global warming. *Climate* 8(2) (2020).
- 36) McSweeney, C.F. & Jones, R.G. How representative is the spread of climate projections from the 5 CMIP5 GCMs used in ISI-MIP? *Climate Services* 1, 24–29 (2016).

- 37) Arnal, L., et al. EFAS upgrade for the extended model domain – technical documentation, EUR 29323 EN, *Publications Office of the European Union*, Luxembourg, ISBN 978-92-79-92881-9, doi:10.2760/806324, JRC111610 (2019).
- 38) Manni P., & Sbarigia M. Dams in Europe, in: Sharing Experience for safe and sustainable water storage, *proceedings of the 9th ICOLD European Club Symposium*, 10-12 April 2013, Venice.
- 39) Batista e Silva, F., et al. From place of residence to place of activity: towards spatiotemporal mapping of population density in Europe. In: *Proceedings of the AGILE Conference 2018*, Lund, Sweden (2018).
- 40) Rosina K., et al. Increasing the detail of European land use/ cover data by combining heterogeneous data sets, *International Journal of Digital Earth*, DOI:10.1080/17538947.2018.1550119 (2018).
- 41) van Ginkel, K. C. H., Dottori, F., Alfieri, L., Feyen, L., Koks, E. E. Flood risk assessment of the European road network, *Nat. Hazards Earth Syst. Sci.*, 21, 1011–1027, (2021).
- 42) Smith A. et al., New estimates of flood exposure in developing countries using high-resolution population data. *Nat. Communications* 10, 1814 (2019).
- 43) De Moel, H., Aerts, J. C. J. H. Effect of uncertainty in land use, damage models and inundation depth on flood damage estimates, *Nat. Hazards* 58, 407-425 (2011).
- 44) Jongman, B., et al. Comparative flood damage model assessment: Towards a European approach. *Nat. Hazards Earth Syst. Sci.*, 12(12), 3733-3752 (2012).
- 45) Amadio, M. et al. Testing empirical and synthetic flood damage models: the case of Italy, *Nat. Hazards Earth Syst. Sci.*, 19, 661–678 (2019).
- 46) Ward, P.J. et al. Assessing flood risk at the global scale: model setup, results, and sensitivity. *Environ. Res. Lett.* 8 044019 (2013)
- 47) Puncochar, P., Flood protection in the Czech Republic and international. *Problemes Actuelles de la protection contre les inondations*, Paris – Orléans 28-30/03/2012. [http://www.donnees.centre.developpement-durable.gouv.fr/symposium/expose/SP1-3\\_eng.pdf](http://www.donnees.centre.developpement-durable.gouv.fr/symposium/expose/SP1-3_eng.pdf) (accessed on 4/5/2022), (2012).
- 48) Soukopova, J., Furova, L. Macroeconomic implication of the floods – a case study for the regions of the Czech Republic. *Acta univ. agric. et silvic. Mendel. Brun.*, 2012, LX,

- No. 7, [https://is.muni.cz/repo/1073621/soukopova\\_furova\\_60\\_7\\_2012.pdf](https://is.muni.cz/repo/1073621/soukopova_furova_60_7_2012.pdf) (accessed on 19/4/2021) (2012).
- 49) Silander, J., Huokuna, M., Sane, M., Aaltonen, J., Parjanne A. Flood hazard and risk maps & storm water floods in Finland. Seminar on Climate Change Adaptation in the Gulf of Finland, [http://cliplive.infoeco.ru/dl/sem1/SilanderJari\\_SYKE.pdf](http://cliplive.infoeco.ru/dl/sem1/SilanderJari_SYKE.pdf) (Accessed on 19/4/2021) (2012)
- 50) Moncoulon, D., et al. Analysis of the French insurance market exposure to floods: a stochastic model combining river overflow and surface runoff, *Nat. Hazards Earth Syst. Sci.* 14, 2469–2485 (2014).
- 51) Federation Francaise de l'Assurance (FFA). Impact du changement climatique sur l'assurance a l'horizon 2040 (2015).
- 52) Richert C., Erdlenbruch, K., Grelot, F., The impact of flood management policies on individual adaptation actions: Insights from a French case study. *Ecological Economics* 165, 106387 (2019).
- 53) Office of Public Works. Report of the Flood Policy Review Group <https://www.opw.ie/media/Report%20of%20the%20Flood%20Policy%20Review%20Group.pdf>, accessed on 19/4/2021, (2003)
- 54) Berg, H. Norway Flood inundation maps—mapping of flood prone areas in Norway. *Proceedings of The Extremes of the Extremes: Extraordinary Floods*, Reykjavik, Iceland, July 2000, IAHS Publ. no. 271 (2002).
- 55) World Bank Group - GFDRR. Europe and Central Asia (ECA) risk profiles – Poland, <http://pubdocs.worldbank.org/en/164681483041874662/poland.pdf> (accessed on 19/4/2021) (2015)
- 56) Ministry of Environment and Water Management (MMAF). Flood Management in Romania – present and future, [https://www.inbo-news.org/en/file/262113/download?token=\\_qdFXrlq](https://www.inbo-news.org/en/file/262113/download?token=_qdFXrlq) (accessed on 4/5/2022)
- 57) Zeleňáková M., Vranayová Z., Flood damages in Slovakia. in: *Recent Advances in Environmental and Earth Sciences and Economics*, Proceedings of the 2015 International Conference on Energy, Environment, Development and Economics (EEDE 2015) Zakynthos Island, Greece July 16-20, 2015 ISBN: 978-1-61804-324-5



- 58) Komelj J., Reinsurance of catastrophe risks in Slovenia (2015) (accessed on 19/4/2021, [www.aktuar.rs/XIII/8.pdf](http://www.aktuar.rs/XIII/8.pdf) ).
- 59) Consorcio de Compensación de Seguros (CCS) e Instituto Geológico y Minero de España. Perdidas por terremotos e inundaciones en España durante el periodo 1987-2001 y su estimación para los próximos 30 años (2004-2033), <https://www.tiempo.com/ram/1956/perdidas-por-terremotos-e-inundaciones-en-espaa-durante-el-periodo-1987-2001-y-su-estimacin-para-los-prximos-30-aos-2004-2033/> (accessed on 19/4/2021)
- 60) Swiss Federal Institute for Forest, Snow and Landscape Research (WSL), (<https://www.slf.ch/en/news/2018/03/substantial-flood-and-landslide-damage-in-switzerland-2017-eight-deaths-and-extensive-material-damage.html> (accessed on 19/4/2021) (2018)
- 61) Office of Science and Technology. United Kingdom Foresight Future Flooding - Executive summary. [https://assets.publishing.service.gov.uk/government/uploads/system/uploads/attachment\\_data/file/300332/04-947-flooding-summary.pdf](https://assets.publishing.service.gov.uk/government/uploads/system/uploads/attachment_data/file/300332/04-947-flooding-summary.pdf) (Accessed on 19/4/2021) (2004),
- 62) Sairam, N., et al. Process-based flood risk assessment for Germany. *Earth's Future*, 9, e2021EF002259 (2021).
- 63) UNISDR. Making Development Sustainable: The Future of Disaster Risk Management. Global Assessment Report on Disaster Risk Reduction. Geneva, Switzerland (2015).
- 64) Poussin, J.K., Wouter Botzen, W.J. & Aerts, J.C.J.H. Effectiveness of flood damage mitigation measures: Empirical evidence from French flood disasters. *Global Environmental Change* 31, 74–84 (2015).
- 65) Silva, W., Dijkman J.P.M. & Loucks D.P. Flood management options for The Netherlands, *International Journal of River Basin Management* 2-2, 101-112 (2004).
- 66) Castellarin A., Domeneghetti A. & Brath A. Identifying robust large-scale flood risk mitigation strategies: A quasi-2D hydraulic model as a tool for the Po river, *Physics and Chemistry of the Earth*, 36, 299-308 (2011).
- 67) Springer, J., Zwirgmaier V., Perosa, F., & Disse, M. 1D hydraulic model chain along the Danube and tributaries, Deliverable D 4.1.2 of the Danube Floodplain project, <https://www.interreg->

[danube.eu/uploads/media/approved\\_project\\_output/0001/44/1f8443242f3509ebcd6585ac7f5505b421c6b722.pdf](https://danube.eu/uploads/media/approved_project_output/0001/44/1f8443242f3509ebcd6585ac7f5505b421c6b722.pdf) (accessed on 13/10/2022) (2020).

- 68) Baptist, M.J. et al. Flood detention, nature development and water quality along the lowland river Sava, Croatia. *Hydrobiologia* 565, 243–257, in: *Living Rivers: Trends and Challenges in Science and Management* (R.S.E.W. Leuven, A.M.J. Ragas, A.J.M. Smits & G. van der Velde eds.) (2006), doi 10.1007/s10750-005-1917-3
- 69) Farrag, M., et al. On the role of floodplain storage and hydrodynamic interactions in flood risk estimation, *Hydrological Sciences Journal* 67:4, 508-534 (2022)
- 70) Multi-Hazard Mitigation Council (MHMC). Natural Hazard Mitigation Saves: 2019 Report. Principal Investigator Porter, K.; Co-Principal Investigators Dash, N., Huyck, C., Santos, J., Scawthorn, C.; Investigators: Eguchi, M., et al., Directors, MMC. Investigator Intern: Cohen-Porter, A. National Institute of Building Sciences. Washington, DC. [www.nibs.org](http://www.nibs.org) (2019).
- 71) Kind, J., Wouter Botzen, W.J.W, and Aerts, J.C.J.H., Accounting for risk aversion, income distribution and social welfare in cost-benefit analysis for flood risk management, *WIREs Clim. Change*, 8:e446 (2017).
- 72) Hino, M. and Nance, H. Five ways to ensure flood-risk research helps the most vulnerable. *Nature* 595 (2021).
- 73) Koks, E.E., Jongman, B., Husby, T.G., Botzen, W.J.W. ,Combining hazard, exposure and social vulnerability to provide lessons for flood risk management. *Env. Sci. Policy* 47, 42–52 (2015).
- 74) Savelli E., Rusca, M., Cloke, H., Di Baldassarre, G., Don't blame the rain: Social power and the 2015–2017 drought in Cape Town, *J. Hydrol.* 594, 125953 (2021).
- 75) Drakes, O., Tate, E., Rainey J., Brody, S. Social vulnerability and short-term disaster assistance in the United States, *International Journal of Disaster Risk Reduction* 53, 102010 (2021).
- 76) Thaler, T. and Hartmann, T., Justice and flood risk management: reflecting on different approaches to distribute and allocate flood risk management in Europe, *Nat Hazards* 83, 129–147 (2016)

- 77) Kind, J., Botzen, W.J.W., Aerts, J.C.J.H., Social vulnerability in cost-benefit analysis for flood risk management. *Environment and Development Economics*, 25 (2), 115-134 (2020).
- 78) Mechler, R. Reviewing estimates of the economic efficiency of disaster risk management: opportunities and limitations of using risk-based cost–benefit analysis. *Nat. Hazards* 81, 2121–2147, (2016).
- 79) European Commission. Guide to Cost-Benefit Analysis of Investment Projects. doi:10.2776/97516 (2015).
